# Supplementary material
Source: publisher figshare collection journal article supplement (https://acs.figshare.com/ndownloader/files/3991441)
Supplement: Supplementary file 1 [file 3991441]

## Combination of a New Chiroptical Probe and Theoretical Calculations for Chirality Detection of Primary Amines

Shunsuke Kuwahara,<sup>\*</sup> Masaya Nakamura, Akira Yamaguchi, Mari Ikeda, and Yoichi Habata

*Department of Chemistry, Faculty of Science, Toho University, 2-2-1 Miyama, Funabashi, Chiba 274-8510, Japan*

|     |                                                                                                                                          |       |
|-----|------------------------------------------------------------------------------------------------------------------------------------------|-------|
| 1.  | Materials and methods                                                                                                                    | 2     |
| 2.  | Synthesis of chiroptical probe <b>1</b>                                                                                                  | 2–4   |
| 3.  | Coupling reaction of chiroptical probe <b>1</b> with chiral amines                                                                       | 4–6   |
| 4.  | <sup>1</sup> H and <sup>13</sup> C NMR spectra of <b>1</b> , <b>11–13</b> , ( <i>S</i> )- <b>2a–8a</b> , ( <i>R</i> )- <b>2a</b>         | 7–19  |
| 5.  | CD and UV Spectra of aliphatic amines ( <i>S</i> )- <b>2a–6a</b>                                                                         | 20    |
| 6.  | CD and UV Spectra of aromatic amines ( <i>S</i> )- <b>7a</b> and <b>8a</b>                                                               | 20    |
| 7.  | CD and UV Spectra of ( <i>S</i> )- <b>2a</b> and ( <i>R</i> )- <b>2a</b>                                                                 | 21    |
| 8.  | CD and UV Spectra of ( <i>S</i> )- <b>2a</b> with varying solvents                                                                       | 21    |
| 9.  | CD spectral data of ( <i>S</i> )- <b>2a–(S)</b> - <b>8a</b>                                                                              | 22    |
| 10. | Theoretical calculations of ( <i>S</i> )- <b>2b–(S)</b> - <b>4b</b> and ( <i>S</i> )- <b>6b–(S)</b> - <b>8b</b><br>at B3LYP/6-31G* level | 22–29 |
| 11. | Theoretical calculations of ( <i>S</i> )- <b>2b–(S)</b> - <b>4b</b> and ( <i>S</i> )- <b>6b–(S)</b> - <b>8b</b><br>at HF/6-31G* level    | 29–35 |
| 12. | CD and UV Spectra of ( <i>S</i> )- <b>2a</b> and ( <i>R</i> )- <b>2a</b> with varying %ee value                                          | 36    |
| 13. | X-ray Structure Determination of ( <i>S</i> )- <b>2a</b> , ( <i>S</i> )- <b>3a</b> and ( <i>S</i> )- <b>6a</b>                           | 36–39 |
| 14. | References                                                                                                                               | 40    |

## Materials and methods

All reagents and solvents were commercially available and used without further purification. IR spectra were obtained as KBr disks on a JASCO FT/IR-410 spectrophotometer.  $^1\text{H}$ -NMR spectra were recorded on Jeol ECP400 (400 MHz) spectrometers.  $^{13}\text{C}$  NMR spectra were obtained on Jeol ECP400 (100 MHz) spectrometers. All NMR spectroscopic data of  $\text{CDCl}_3$  solutions are reported in ppm ( $\delta$ ) downfield from TMS. UV and CD spectra were recorded on JASCO V-650 and JASCO J-820 spectrometers, respectively. CD spectra were recorded with the following measurement parameters: scan speed, 20 nm/min; resolution, 0.2 nm; bandwidth, 1.0 nm; response, 4.0 s; 4–10 accumulations.

Silica gel 60 F254 precoated plates on glass from Merck Ltd. were used for thin layer chromatography (TLC).

## Synthesis of chiroptical probe 1

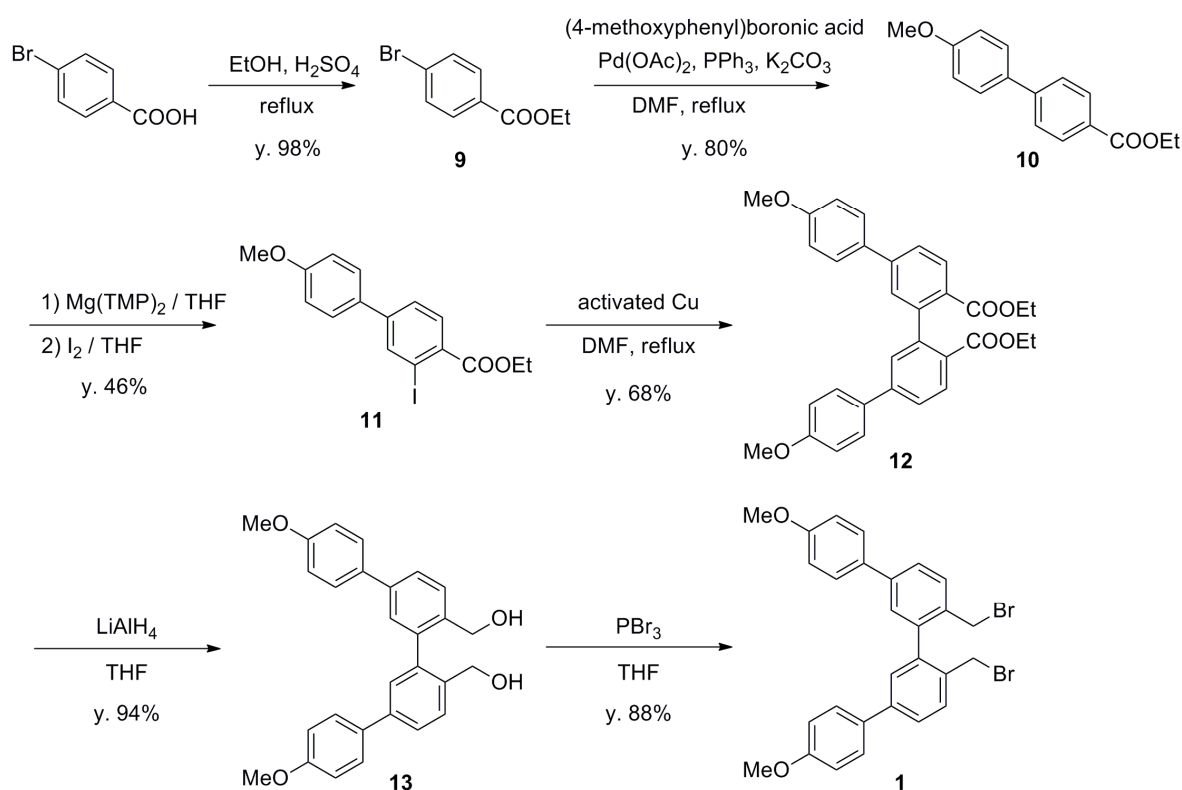

## Ethyl 2-iodine-4-(4-Methoxyphenyl)benzonate (11)

Ethyl 4-(4-Methoxyphenyl)benzonate (**10**)<sup>1</sup> was synthesized by Suzuki-Miyaura coupling from ester **9**. Iodination of **10** was carried out according to the literature procedure.<sup>2</sup> To a THF solution of  $(\text{TMP})_2\text{Mg}$  (0.29 M, 22 mmol) was added **10** (0.95 g, 3.7 mmol) in dry THF (10 mL) dropwise at 0 °C under  $\text{N}_2$  atmosphere and the mixture was stirred at room temperature for 3.5 h. After being cooled to -78 °C, a THF (10 mL) solution of  $\text{I}_2$  (5.6 g, 22 mmol) was added and stirring was continued for 1 h at room temperature. The mixture was then poured into cooled 1 N HCl, washed with saturated  $\text{Na}_2\text{SO}_3$ , and extracted with  $\text{CHCl}_3$ . The organic layer was dried over  $\text{Na}_2\text{SO}_4$  and evaporated to dryness. The

crude product was purified by column chromatography on silica gel (CHCl<sub>3</sub> as eluent) to yield ester **11** (0.66 g, 46%) as pale red oil; <sup>1</sup>H NMR (400 MHz, CDCl<sub>3</sub>) δ 8.19 (d, *J* = 1.8 Hz, 1H), 7.87 (d, *J* = 8.1 Hz, 1H), 7.57 (dd, *J*<sub>1</sub> = 8.8 Hz, *J*<sub>2</sub> = 1.8 Hz, 1H), 7.52 (dd, *J*<sub>1</sub> = 8.8 Hz, *J*<sub>2</sub> = 2.1 Hz, 2H), 6.98 (dd, *J*<sub>1</sub> = 8.8 Hz, *J*<sub>2</sub> = 2.1 Hz, 2H), 4.40 (q, *J* = 7.1 Hz, 2H), 3.87 (s, 3H), 1.41 (t, *J* = 7.1 Hz, 3H); <sup>13</sup>C NMR (100 MHz, CDCl<sub>3</sub>) δ 166.3, 160.1, 145.2, 139.5, 132.7, 131.3, 130.7, 128.4, 125.9, 114.5, 61.6, 55.4, 14.3; *m/z* (matrix: DTT/TG = 1/1) = 383 ([M+1]<sup>+</sup>, 100%). Because of instability of ester **11**, elemental analysis was not carried out.

### **Ethyl (2-Ethyl 4-(4-Methoxyphenyl)benzonate)-4-(4-Methoxyphenyl)benzonate (12)**

A solution of ester **11** (0.304 g, 0.794 mmol) in dry DMF (1 mL) was added activated Cu (1.28 g, 6.6 mmol) and the mixture was stirred at 135 °C for 2 days. After cooling to room temperature, the mixture was filtered through a pad of Celite, and then AcOEt was added. After washing with 1 N HCl and brine, the organic layer was dried over Na<sub>2</sub>SO<sub>4</sub> and evaporated to dryness. The crude product was purified by column chromatography on silica gel (hexane/EtOAc, v/v 20:1 to 4:1 as eluent) to yield diester **12** (0.14 g, 68%) as white needles: mp 131.0-131.8 °C; <sup>1</sup>H NMR (400 MHz, CDCl<sub>3</sub>) δ 8.09 (d, *J* = 8.1 Hz, 2H), 7.63 (dd, *J*<sub>1</sub> = 8.1 Hz, *J*<sub>2</sub> = 1.9 Hz, 2H), 7.59 (dd, *J*<sub>1</sub> = 8.8 Hz, *J*<sub>2</sub> = 2.2 Hz, 4H), 7.45 (d, *J* = 1.9 Hz, 2H), 6.98 (dd, *J*<sub>1</sub> = 8.8 Hz, *J*<sub>2</sub> = 2.2 Hz, 4H), 4.06 (m, 4H), 3.85 (s, 6H), 0.98 (t, *J* = 7.2 Hz, 6H); <sup>13</sup>C NMR (100 MHz, CDCl<sub>3</sub>) δ 167.1, 159.8, 144.1, 143.6, 132.2, 130.6, 128.4, 128.3, 128.0, 125.0, 114.3, 60.5, 55.4, 13.7; IR (KBr) ν<sub>max</sub> 3034, 2981, 2937, 2835, 1719, 1599, 1519, 1484, 1280, 1251, 1089, 1044, 893, 828 cm<sup>-1</sup>; *m/z* (matrix: DTT/TG = 1/1) = 511 ([M+1]<sup>+</sup>, 25%); Anal. Calcd for C<sub>32</sub>H<sub>30</sub>O<sub>6</sub>: C, 75.28; H, 5.92. Found: C, 75.09; H, 5.87.

### **(4,4'''-Dimethoxy-1,1':3',1'':3'',1'''-quaterphenyl-4',6''-diyl)dimethanol (13)**

To a mixture of LiAlH<sub>4</sub> (0.0314 g, 0.826 mmol) and dry THF (1.0 mL) cooled at 0 °C was added dropwise a solution of diester **12** (0.115 g, 0.226 mmol) in dry THF (2.0 mL), and the reaction mixture was stirred at room temperature for 1.5 h. The reaction mixture was quenched with a minimum amount of water, and the organic layer was filtered. The organic layer was dried over Na<sub>2</sub>SO<sub>4</sub> and evaporated to dryness to yield diol **13** (0.14 g, 68%) as white needles: mp 154.0-155.0 °C; <sup>1</sup>H NMR (400 MHz, CDCl<sub>3</sub>) δ 7.62 (dd, *J*<sub>1</sub> = 7.7 Hz, *J*<sub>2</sub> = 1.6 Hz, 2H), 7.58-7.55 (m, 6H), 7.43 (d, *J* = 1.6 Hz, 4H), 6.97 (d, *J* = 8.8 Hz, 2H), 4.47 (m, 4H), 3.85 (s, 6H), 2.57 (s, 2H); <sup>13</sup>C NMR (100 MHz, CDCl<sub>3</sub>) δ 159.4, 140.5, 140.2, 137.1, 132.8, 130.2, 128.2, 126.3, 114.3, 62.7, 55.4; IR (KBr) ν<sub>max</sub> 3360, 3034, 2999, 2923, 2837, 1609, 1519, 1487, 1248, 1035, 890, 817 cm<sup>-1</sup>; *m/z* (matrix: DTT/TG = 1/1) = 392 ([M-2OH]<sup>+</sup>, 20%); Anal. Calcd for C<sub>28</sub>H<sub>26</sub>O<sub>4</sub>: C, 78.85; H, 6.14. Found: C, 78.58; H, 6.10.

### **4',6''-Bis(bromomethyl)-4,4'''-dimethoxy-1,1':3',1'':3'',1'''-quaterphenyl (1)**

PBr<sub>3</sub> (0.1 mL, 1 mmol) was added to a solution of diol **13** (0.085 g, 0.20 mmol) in dry THF (1.2 mL) at 0°C, and the reaction mixture was stirred at room temperature for 1 h. The reaction mixture was quenched with a minimum amount of water, and then AcOEt was added. After washing with 5% aq. NaHCO<sub>3</sub> and brine, the organic layer was dried over Na<sub>2</sub>SO<sub>4</sub> and evaporated to dryness. The crude product was recrystallized from hexane/EtOAc to yield dibromide **1** (0.097 g, 88%) as white needles: mp 164.0-165.0 °C; <sup>1</sup>H NMR (400 MHz, CDCl<sub>3</sub>) δ 7.64-7.58(m, 8H), 7.55 (s, 2H), 6.98 (d, *J* = 8.8 Hz, 4H), 4.38 (m, 4H), 3.85 (s, 6H); <sup>13</sup>C NMR (100 MHz, CDCl<sub>3</sub>) δ 159.5, 140.8, 139.9, 134.1, 131.2, 128.3, 128.2, 126.8, 114.3, 55.4, 32.2; IR (KBr) ν<sub>max</sub> 3057, 3019, 2963, 2935, 2834, 1606, 1517, 1481, 1249, 1177, 1030, 903, 821, 591 cm<sup>-1</sup>; *m/z* (matrix: DTT/TG = 1/1) = 550 ([M-2]<sup>+</sup>, 10%), 552 ([M]<sup>+</sup>, 20%), 554 ([M+2]<sup>+</sup>, 10%); Anal. Calcd for C<sub>28</sub>H<sub>24</sub>Br<sub>2</sub>O<sub>2</sub>: C, 60.89; H, 4.38. Found: C, 60.97; H, 4.41.

### Coupling reaction of chiroptical probe **1** with chiral amines

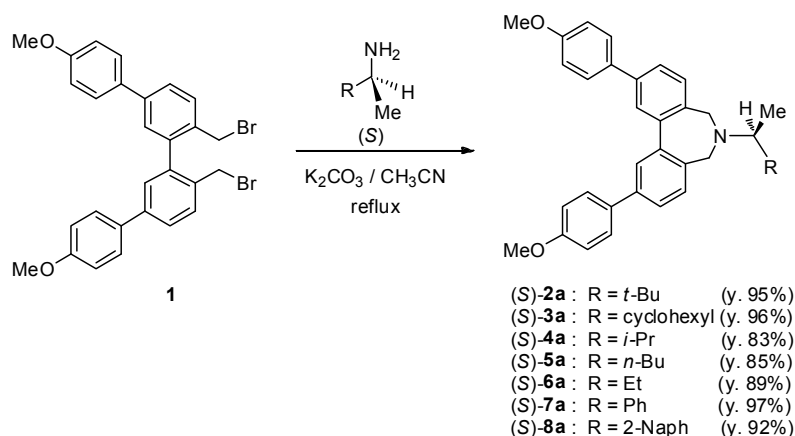

### 6-[(2*S*)-3,3-dimethylbutan-2-yl]-2,10-bis(4-methoxyphenyl)-6,7-dihydro-5*H*-dibenzo[*c,e*]azepine ((S)-**2a**)

A mixture of dibromide **1** (12 mg, 0.022 mmol), (S)-3,3-dimethylbutan-2-amine (3.00 μL, 0.037 mmol) and K<sub>2</sub>CO<sub>3</sub> (8.7 mg, 0.063 mmol) in CH<sub>3</sub>CN (0.3 mL) was refluxed for 2 h. After cooling to room temperature, the mixture was filtered through a pad of Celite, and then evaporated to dryness. The crude product was purified by column chromatography on silica gel (EtOAc as eluent) to yield amine (S)-**2a** (10.3 mg, 95%) as colorless prisms: mp 155.5 °C (dec.); <sup>1</sup>H NMR (400 MHz, CDCl<sub>3</sub>) δ 7.71 (d, *J* = 1.8 Hz, 2H), 7.60 (d, *J* = 8.7 Hz, 4H), 7.55 (dd, *J*<sub>1</sub> = 7.8 Hz, *J*<sub>2</sub> = 1.8 Hz, 2H), 7.41 (d, *J* = 7.8 Hz, 2H), 6.99 (d, *J* = 8.7 Hz, 4H), 3.86 (s, 6H), 3.68 (d, *J* = 12.5 Hz, 2H), 3.57 (d, 12.5 Hz, 2H), 2.63 (q, *J* = 7.0 Hz, 1H), 1.14 (d, *J* = 7.0 Hz, 3H), 0.99 (s, 9H); <sup>13</sup>C NMR (100 MHz, CDCl<sub>3</sub>) δ 159.2, 141.4, 140.1, 135.7, 133.6, 130.3, 128.2, 126.2, 125.8, 114.3, 68.7, 55.4, 54.5, 36.8, 27.1, 11.6; IR (KBr) ν<sub>max</sub> 3038, 2995, 2954, 2834, 1608, 1518, 1488, 1284, 1266, 1244, 1046, 892, 821 cm<sup>-1</sup>; *m/z* (matrix: DTT/TG = 1/1) = 492 ([M+1]<sup>+</sup>, 60%); Anal. Calcd for C<sub>34</sub>H<sub>37</sub>NO<sub>2</sub>: C, 83.06; H, 7.59; N, 2.85.

Found: C, 83.00; H, 7.33; N, 2.77.

**6-[(2*R*)-3,3-dimethylbutan-2-yl]-2,10-bis(4-methoxyphenyl)-6,7-dihydro-5*H*-dibenzo[*c,e*]azepine ((*R*)-2a)**

Colorless prisms: mp 155.5 °C (dec.); <sup>1</sup>H NMR (400 MHz, CDCl<sub>3</sub>) δ 7.70 (d, *J* = 1.8 Hz, 2H), 7.60 (d, *J* = 8.8 Hz, 4H), 7.55 (dd, *J*<sub>1</sub> = 7.8 Hz, *J*<sub>2</sub> = 1.8 Hz, 2H), 7.41 (d, *J* = 7.8 Hz, 2H), 6.99 (d, *J* = 8.8 Hz, 4H), 3.86 (s, 6H), 3.68 (d, *J* = 12.5 Hz, 2H), 3.57 (d, 12.5 Hz, 2H), 2.63 (q, *J* = 7.0 Hz, 1H), 1.14 (d, *J* = 7.0 Hz, 3H), 0.99 (s, 9H); <sup>13</sup>C NMR (100 MHz, CDCl<sub>3</sub>) δ 159.2, 141.4, 140.1, 135.7, 133.6, 130.3, 128.2, 126.2, 125.8, 114.3, 68.7, 55.4, 54.4, 36.8, 27.1, 11.6; IR (KBr) ν<sub>max</sub> 3022, 2997, 2952, 2833, 1607, 1518, 1489, 1294, 1270, 1037, 889, 821 cm<sup>-1</sup>; *m/z* (matrix: DTT/TG = 1/1) = 492 ([*M*+1]<sup>+</sup>, 20%); Anal. Calcd for C<sub>34</sub>H<sub>37</sub>NO<sub>2</sub>·1/10AcOEt: C, 82.56; H, 7.61; N, 2.80. Found: C, 82.38; H, 7.54; N, 2.85.

**6-[(1*S*)-1-cyclohexylethyl]-2,10-bis(4-methoxyphenyl)-6,7-dihydro-5*H*-dibenzo[*c,e*]azepine ((*S*)-3a)**

Colorless prisms: mp 157.5 °C (dec.); <sup>1</sup>H NMR (400 MHz, CDCl<sub>3</sub>) δ 7.71 (d, *J* = 1.8 Hz, 2H), 7.60 (d, *J* = 8.8 Hz, 4H), 7.55 (dd, *J*<sub>1</sub> = 7.7 Hz, *J*<sub>2</sub> = 1.8 Hz, 2H), 7.42 (d, *J* = 7.7 Hz, 2H), 6.99 (d, *J* = 8.8 Hz, 4H), 3.85 (s, 6H), 3.61 (d, *J* = 12.5 Hz, 2H), 3.53 (d, 12.5 Hz, 2H), 2.55 (quin, *J* = 6.7 Hz, 1H), 1.98-1.59 (m, 5H), 1.29-0.97 (m, 9H); <sup>13</sup>C NMR (100 MHz, CDCl<sub>3</sub>) δ 159.2, 141.5, 140.2, 135.1, 133.5, 130.3, 128.2, 126.1, 125.8, 114.3, 64.0, 55.4, 52.1, 41.6, 31.2, 29.0, 26.9, 26.8, 26.6, 13.8; IR (KBr) ν<sub>max</sub> 3022, 2997, 2952, 2833, 1607, 1518, 1489, 1294, 1270, 1037, 889, 821 cm<sup>-1</sup>; *m/z* (matrix: DTT/TG = 1/1) = 519 ([*M*+2]<sup>+</sup>, 65%); Anal. Calcd for C<sub>36</sub>H<sub>39</sub>NO<sub>2</sub>: C, 83.52; H, 7.59; N, 2.71. Found: C, 83.34; H, 7.29; N, 2.72.

**2,10-bis(4-methoxyphenyl)-6-[(2*S*)-3-methylbutan-2-yl]-6,7-dihydro-5*H*-dibenzo[*c,e*]azepine ((*S*)-4a)**

Colorless prisms: mp 147.9 °C (dec.); <sup>1</sup>H NMR (400 MHz, CDCl<sub>3</sub>) δ 7.72 (d, *J* = 1.8 Hz, 2H), 7.60 (d, *J* = 8.7 Hz, 4H), 7.55 (dd, *J*<sub>1</sub> = 7.8 Hz, *J*<sub>2</sub> = 1.8 Hz, 2H), 7.42 (d, *J* = 7.8 Hz, 2H), 6.99 (d, *J* = 8.7 Hz, 4H), 3.86 (s, 6H), 3.63 (d, *J* = 12.5 Hz, 2H), 3.52 (d, *J* = 12.5 Hz, 2H), 2.49 (quin, *J* = 6.5 Hz, 1H), 2.01 (sext, *J* = 6.6 Hz, 1H), 1.11 (d, *J* = 6.5 Hz, 3H), 1.01 (d, *J* = 6.5 Hz, 3H), 0.95 (d, *J* = 6.6 Hz, 3H); <sup>13</sup>C NMR (100 MHz, CDCl<sub>3</sub>) δ 159.2, 141.5, 140.2, 135.0, 133.5, 130.3, 128.2, 126.0, 125.8, 114.3, 64.2, 55.4, 52.1, 30.8, 21.0, 17.8, 13.2; IR (KBr) ν<sub>max</sub> 3024, 2961, 2897, 2840, 1606, 1519, 1488, 1289, 1250, 1034, 882, 819 cm<sup>-1</sup>; *m/z* (matrix: DTT/TG = 1/1) = 478 ([*M*+1]<sup>+</sup>, 80%); Anal. Calcd for C<sub>33</sub>H<sub>35</sub>NO<sub>2</sub>·1/10AcOEt: C, 82.47; H, 7.42; N, 2.88. Found: C, 82.40; H, 7.17; N, 2.96.

**6-[(2*S*)-hexan-2-yl]-2,10-bis(4-methoxyphenyl)-6,7-dihydro-5*H*-dibenzo[*c,e*]azepine ((*S*)-5a)**

Colorless oil:  $^1\text{H}$  NMR (400 MHz,  $\text{CDCl}_3$ )  $\delta$  7.72 (d,  $J = 1.9$  Hz, 2H), 7.60 (d,  $J = 8.7$  Hz, 4H), 7.56 (dd,  $J_1 = 7.8$  Hz,  $J_2 = 1.9$  Hz, 2H), 7.44 (d,  $J = 7.8$  Hz, 2H), 7.00 (d,  $J = 8.7$  Hz, 4H), 3.86 (s, 6H), 3.62 (m, 4H), 2.82 (m, 1H), 1.69-1.37 (m, 6H), 1.15 (d,  $J = 6.5$  Hz, 3H), 0.96-0.92 (m, 1H);  $^{13}\text{C}$  NMR (100 MHz,  $\text{CDCl}_3$ )  $\delta$  159.2, 141.3, 140.3, 134.7, 133.4, 130.4, 128.2, 128.1, 125.8, 114.3, 58.9, 55.4, 51.8, 34.9, 28.9, 23.0, 17.7, 14.2; IR (KBr)  $\nu_{\text{max}}$  3033, 2953, 2929, 2854, 2834, 1608, 1517, 1488, 1287, 1246, 1032, 888, 818  $\text{cm}^{-1}$ ;  $m/z$  (matrix: DTT/TG = 1/1) = 492 ( $[\text{M}+1]^+$ , 40%); Anal. Calcd for  $\text{C}_{34}\text{H}_{37}\text{NO}_2$ : C, 83.06; H, 7.59; N, 2.85. Found: C, 83.21; H, 7.24; N, 2.75.

**6-[(2*S*)-butan-2-yl]-2,10-bis(4-methoxyphenyl)-6,7-dihydro-5*H*-dibenzo[*c,e*]azepine ((*S*)-6a)**

Colorless prisms: mp 152.6  $^\circ\text{C}$  (dec.);  $^1\text{H}$  NMR (400 MHz,  $\text{CDCl}_3$ )  $\delta$  7.72 (d,  $J = 1.9$  Hz, 2H), 7.60 (d,  $J = 8.8$  Hz, 4H), 7.56 (dd,  $J_1 = 7.8$  Hz,  $J_2 = 1.9$  Hz, 2H), 7.43 (d,  $J = 7.8$  Hz, 2H), 7.00 (d,  $J = 8.8$  Hz, 4H), 3.86 (s, 6H), 3.63 (d,  $J = 12.5$  Hz, 2H), 3.58 (d,  $J = 12.5$  Hz, 2H), 2.73 (m, 1H), 1.77 (m, 1H), 1.52 (m, 1H), 1.20 (d,  $J = 6.5$  Hz, 3H), 0.98 (t,  $J = 7.4$  Hz, 9H);  $^{13}\text{C}$  NMR (100 MHz,  $\text{CDCl}_3$ )  $\delta$  159.2, 141.5, 140.4, 140.4, 133.4, 130.4, 128.2, 126.0, 125.8, 114.3, 60.1, 55.4, 51.8, 22.7, 17.3, 10.9; IR (KBr)  $\nu_{\text{max}}$  3025, 2962, 2936, 2838, 1608, 1518, 1489, 1290, 1248, 1025, 886, 820  $\text{cm}^{-1}$ ;  $m/z$  (matrix: DTT/TG = 1/1) = 465 ( $[\text{M}+1]^+$ , 95%);  $\text{C}_{32}\text{H}_{33}\text{NO}_2 \cdot 1/10\text{AcOEt}$ : C, 82.37; H, 7.21; N, 2.97. Found: C, 82.27; H, 7.05; N, 2.98.

**2,10-bis(4-methoxyphenyl)-6-[(1*S*)-1-phenylethyl]-6,7-dihydro-5*H*-dibenzo[*c,e*]azepine ((*S*)-7a)**

White solid: mp 126.0  $^\circ\text{C}$  (dec.);  $^1\text{H}$  NMR (400 MHz,  $\text{CDCl}_3$ )  $\delta$  7.71 (d,  $J = 1.8$  Hz, 2H), 7.60 (d,  $J = 8.7$  Hz, 4H), 7.55 (dd,  $J_1 = 7.8$  Hz,  $J_2 = 1.8$  Hz, 2H), 7.41 (d,  $J = 7.8$  Hz, 2H), 6.99 (d,  $J = 8.7$  Hz, 4H), 3.86 (s, 6H), 3.68 (d,  $J = 12.5$  Hz, 2H), 3.57 (d, 12.5 Hz, 2H), 2.63 (q,  $J = 7.0$  Hz, 1H), 1.14 (d,  $J = 7.0$  Hz, 3H), 0.99 (s, 9H);  $^{13}\text{C}$  NMR (100 MHz,  $\text{CDCl}_3$ )  $\delta$  159.3, 146.2, 141.7, 140.5, 133.8, 133.4, 130.3, 128.6, 128.2, 127.6, 127.0, 125.9, 125.9, 114.3, 62.6, 55.4, 52.9, 22.7; IR (KBr)  $\nu_{\text{max}}$  3024, 2965, 2930, 2832, 1607, 1517, 1488, 1282, 1247, 1032, 888, 818  $\text{cm}^{-1}$ ;  $m/z$  (matrix: DTT/TG = 1/1) = 512 ( $[\text{M}+1]^+$ , 30%); Anal. Calcd for  $\text{C}_{36}\text{H}_{33}\text{NO}_2$ : C, 84.51; H, 6.50; N, 2.74. Found: C, 84.61; H, 6.30; N, 2.62.

**2,10-bis(4-methoxyphenyl)-6-[(1*S*)-1-(naphthalen-2-yl)ethyl]-6,7-dihydro-5*H*-dibenzo[*c,e*]azepine ((*S*)-8a)**

White Solid: mp 103.9  $^\circ\text{C}$  (dec.);  $^1\text{H}$  NMR (400 MHz,  $\text{CDCl}_3$ )  $\delta$  7.91-7.86 (m, 4H), 7.74 (d,  $J = 1.8$  Hz, 2H), 7.70 (d,  $J = 8.3$  Hz, 1H), 7.61 (d,  $J = 8.8$  Hz, 4H), 7.57 (dd,  $J_1 = 7.8$  Hz,  $J_2 = 1.8$  Hz, 2H), 7.52-7.45 (m, 2H), 7.37 (d,  $J = 7.8$  Hz, 2H), 7.00 (d,  $J = 8.8$  Hz, 4H), 3.86-3.82 (m, 7H), 3.65 (d,  $J = 12.5$  Hz, 2H), 3.42 (d, 12.5 Hz, 2H), 1.57 (d,  $J = 6.5$  Hz, 3H);  $^{13}\text{C}$  NMR (100 MHz,  $\text{CDCl}_3$ )  $\delta$  159.3, 143.7, 141.7, 140.5, 133.8, 133.7, 133.6, 133.4, 132.9, 130.3, 128.5, 128.2, 127.8, 127.7, 126.0, 126.0, 125.9, 125.9, 114.3, 62.7, 55.4, 52.9, 22.7; IR (KBr)  $\nu_{\text{max}}$  3020, 2961, 2931, 2831, 1607, 1515, 1487, 1285, 1246, 1029, 888, 818, 746  $\text{cm}^{-1}$ ;  $m/z$  (matrix: DTT/TG = 1/1) = 563 ( $[\text{M}+2]^+$ , 15%); Anal. Calcd for  $\text{C}_{40}\text{H}_{35}\text{NO}_2$ : C, 85.53; H, 6.28; N, 2.49. Found: C, 85.32; H, 6.49; N, 2.41.

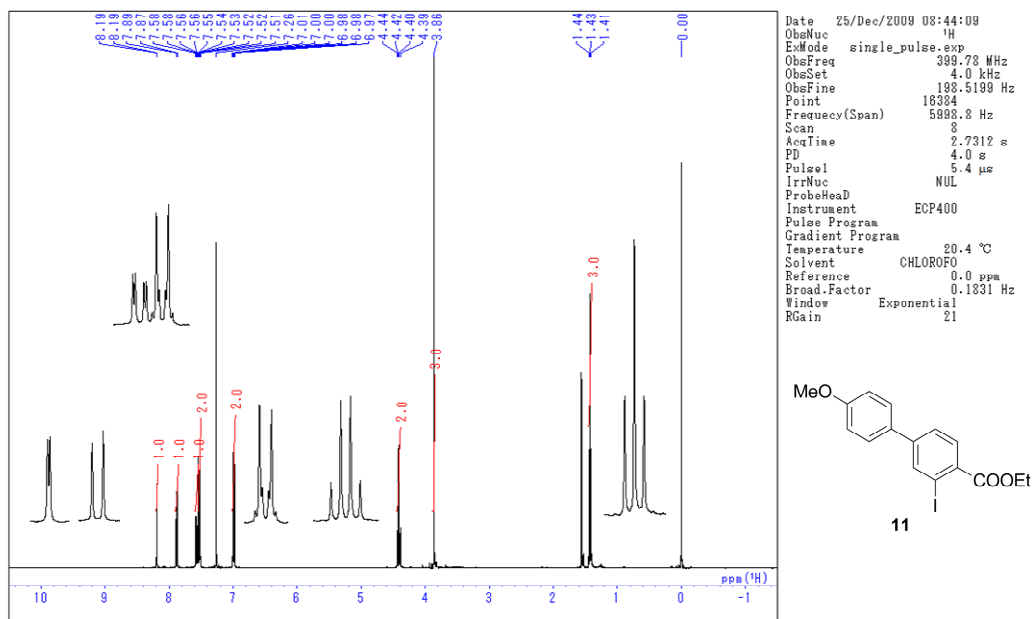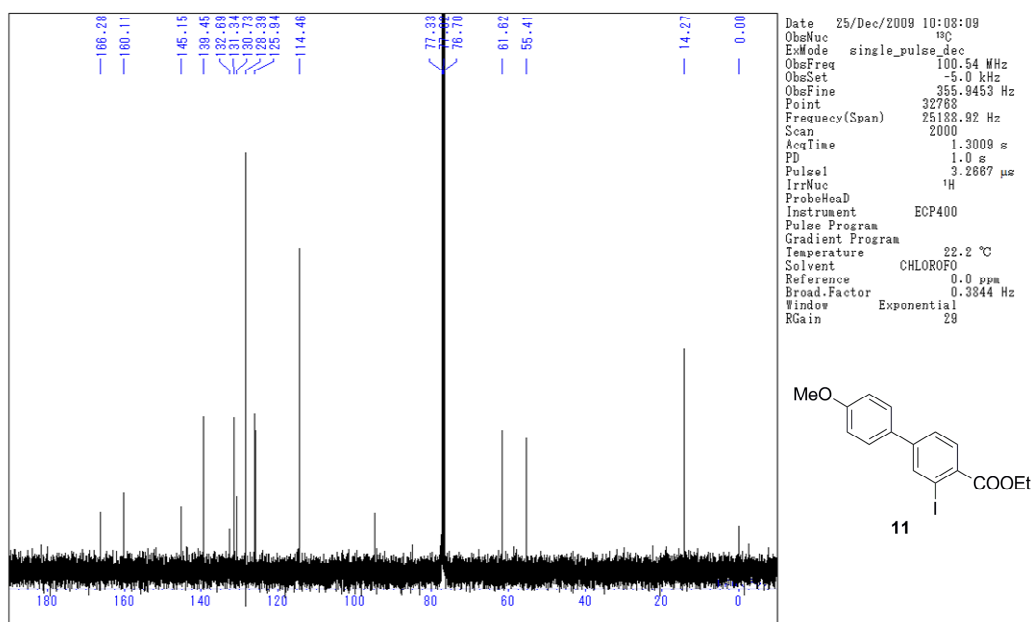

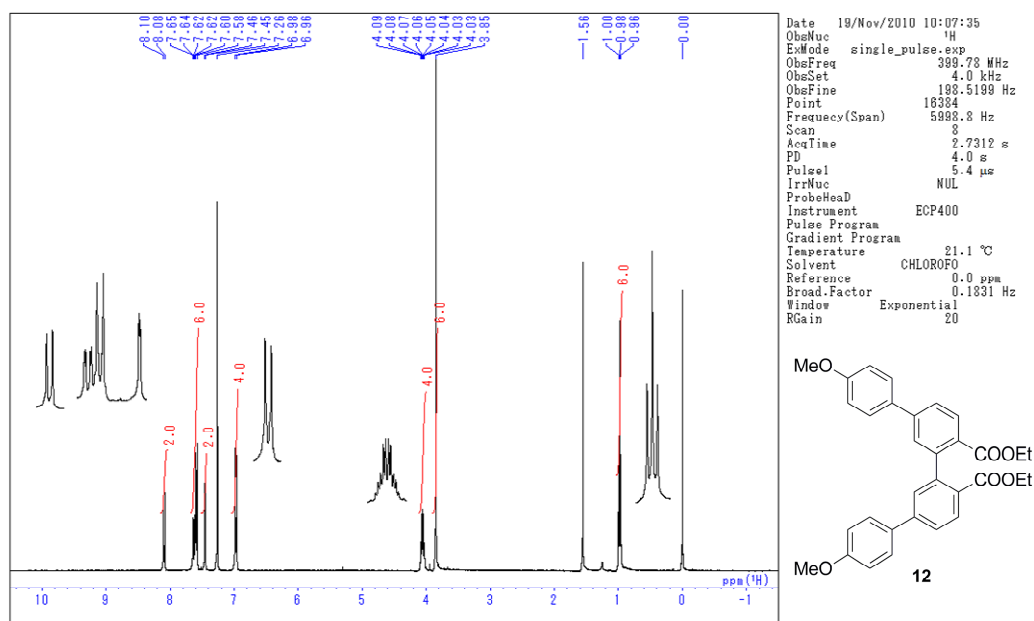

Figure S3.  $^1\text{H}$  NMR Spectrum (400 MHz,  $\text{CDCl}_3$ ) of **12**.

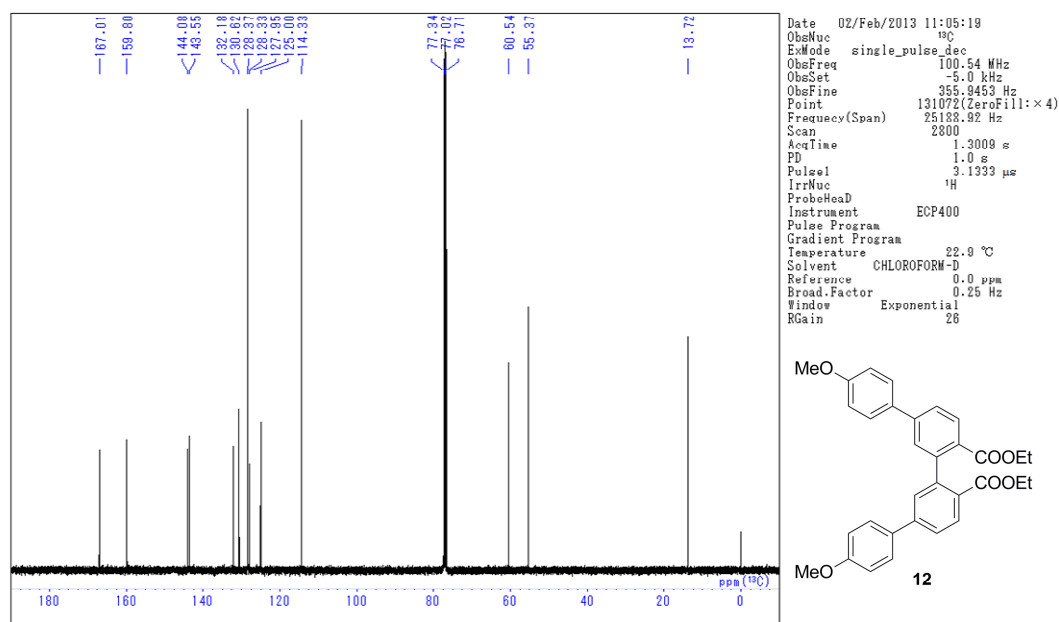

Figure S4.  $^{13}\text{C}$  NMR Spectrum (100 MHz,  $\text{CDCl}_3$ ) of **12**.



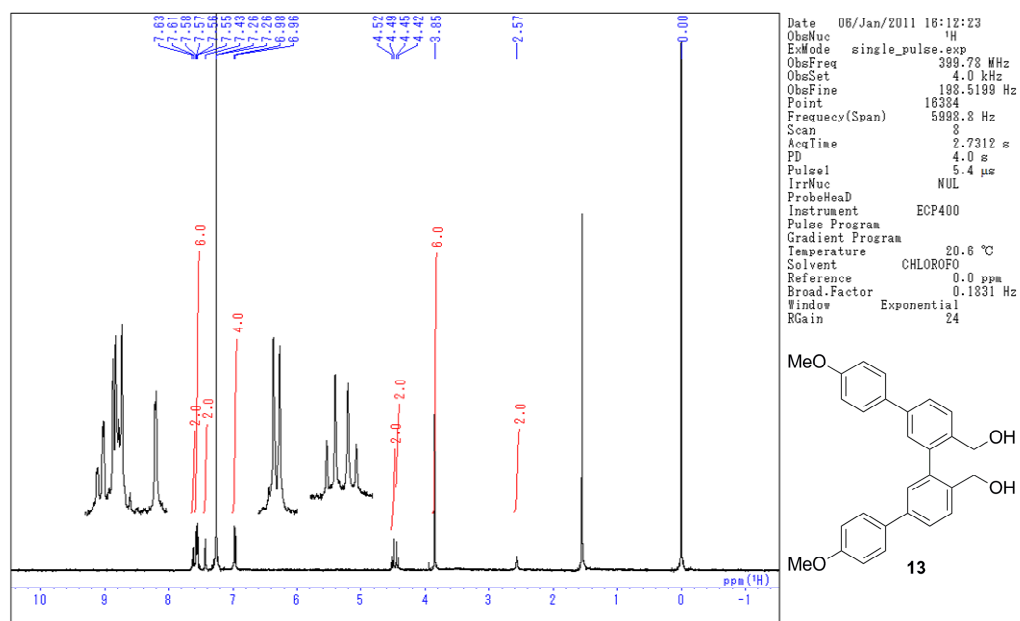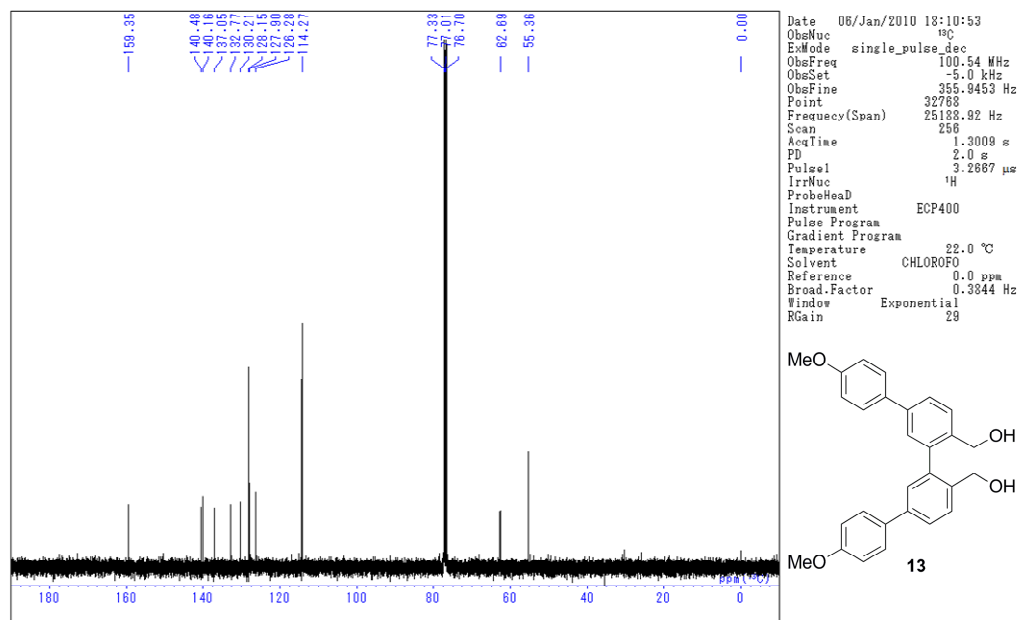

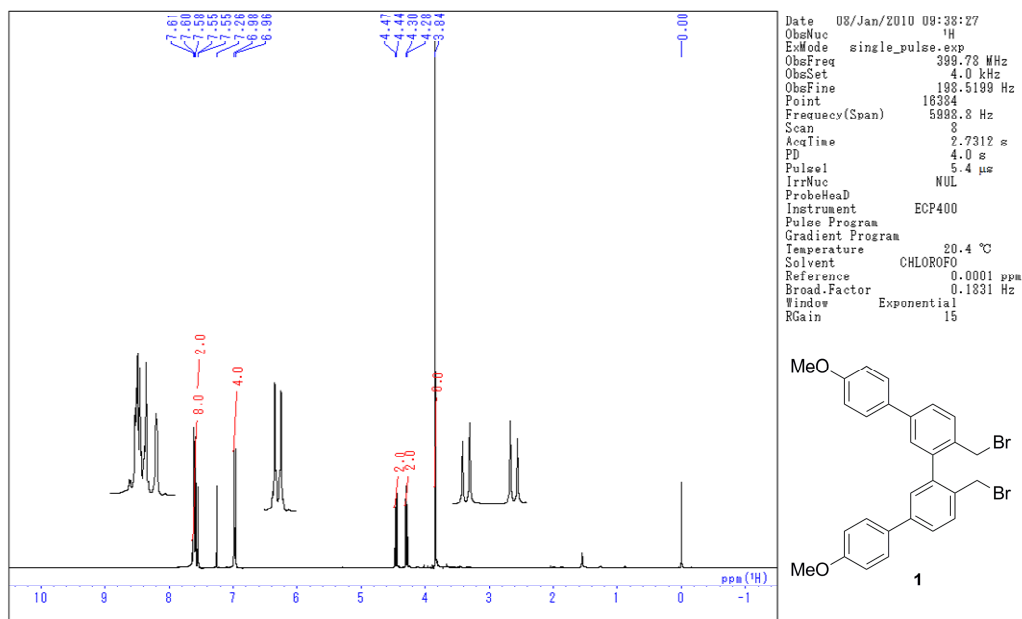

**Figure S7**  $^1\text{H}$  NMR Spectrum (400 MHz,  $\text{CDCl}_3$ ) of **1**.

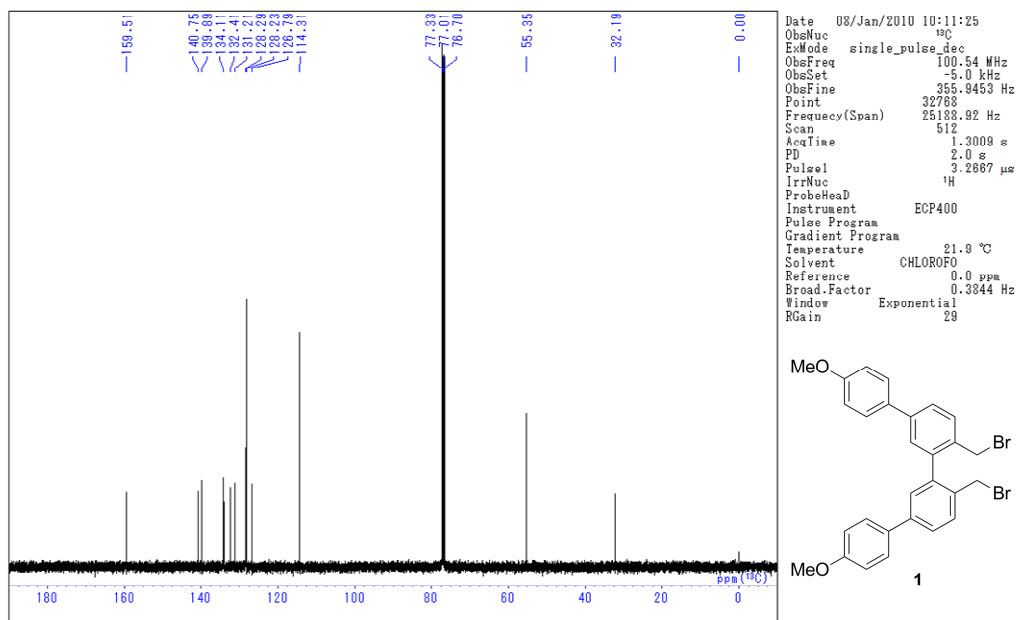

**Figure S8.**  $^{13}\text{C}$  NMR Spectrum (100 MHz,  $\text{CDCl}_3$ ) of **1**.

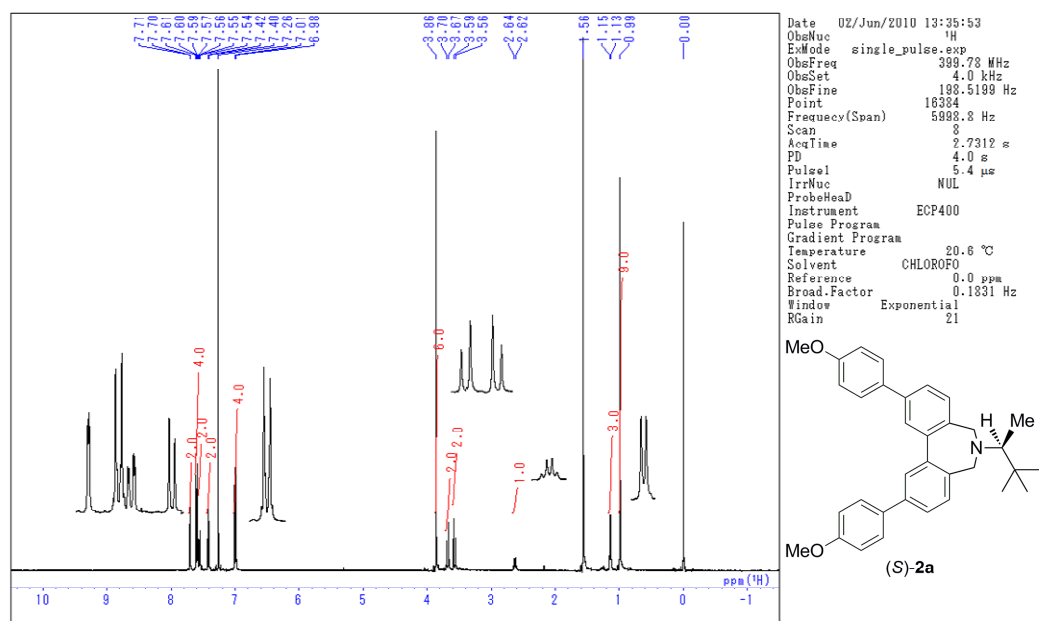

Figure S9.  $^1\text{H}$  NMR Spectrum (400 MHz,  $\text{CDCl}_3$ ) of (S)-2a.

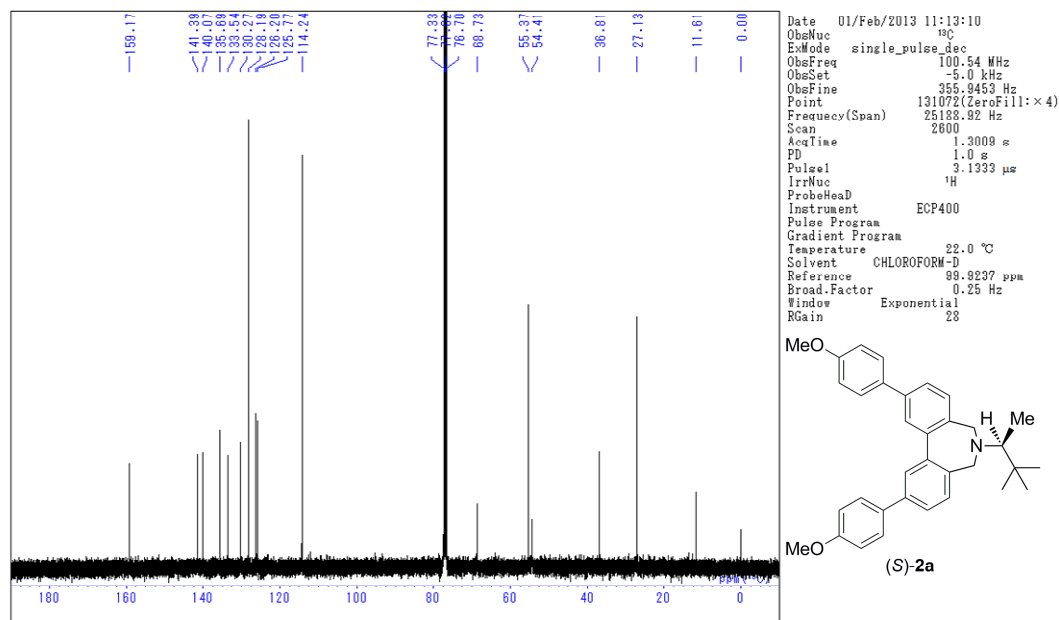

Figure S10.  $^{13}\text{C}$  NMR Spectrum (100 MHz,  $\text{CDCl}_3$ ) of (S)-2a.

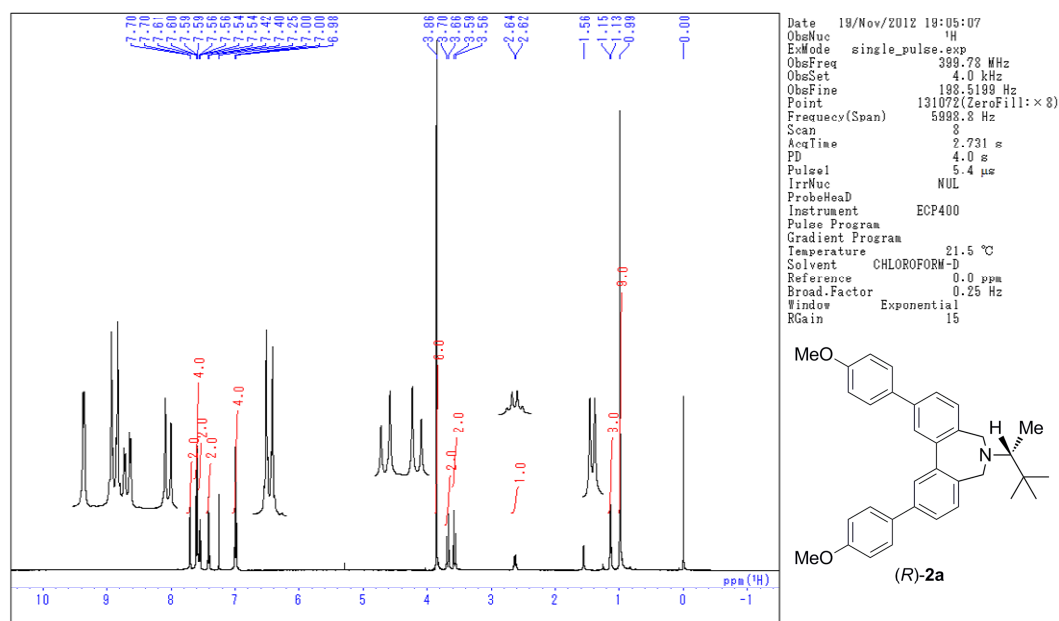

Figure S11.  $^1\text{H}$  NMR Spectrum (400 MHz,  $\text{CDCl}_3$ ) of (R)-2a.

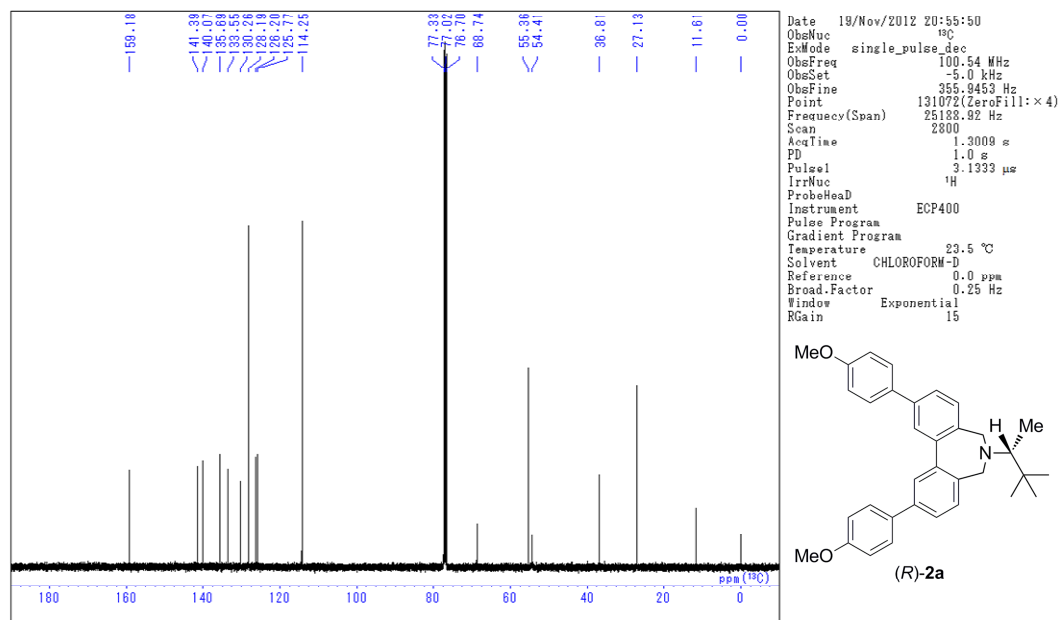

Figure S12.  $^{13}\text{C}$  NMR Spectrum (100 MHz,  $\text{CDCl}_3$ ) of (R)-2a.

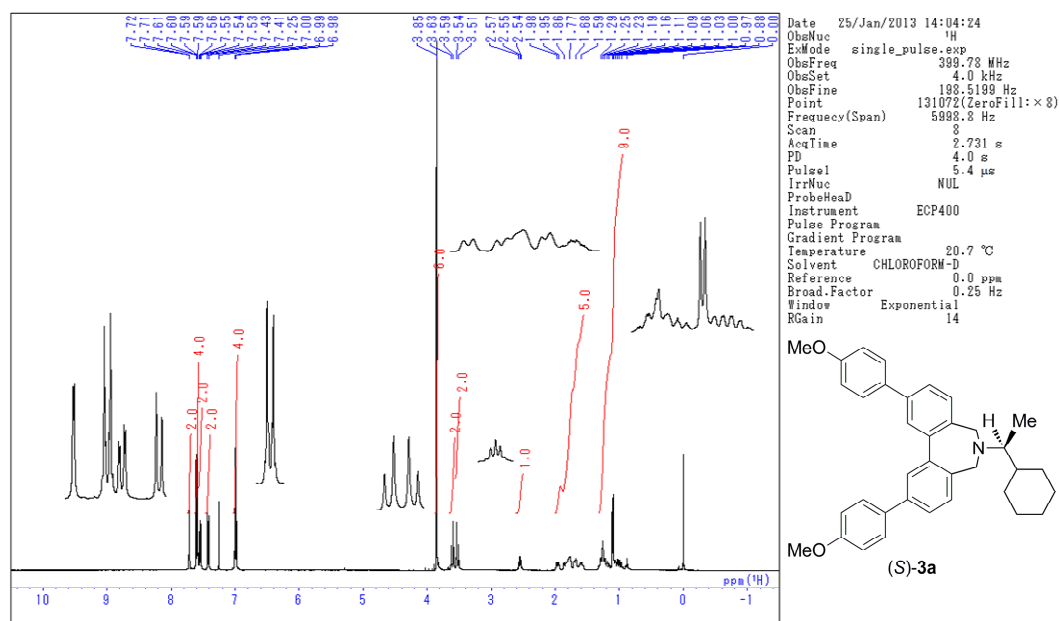

Figure S13.  $^1\text{H}$  NMR Spectrum (400 MHz,  $\text{CDCl}_3$ ) of (S)-3a.

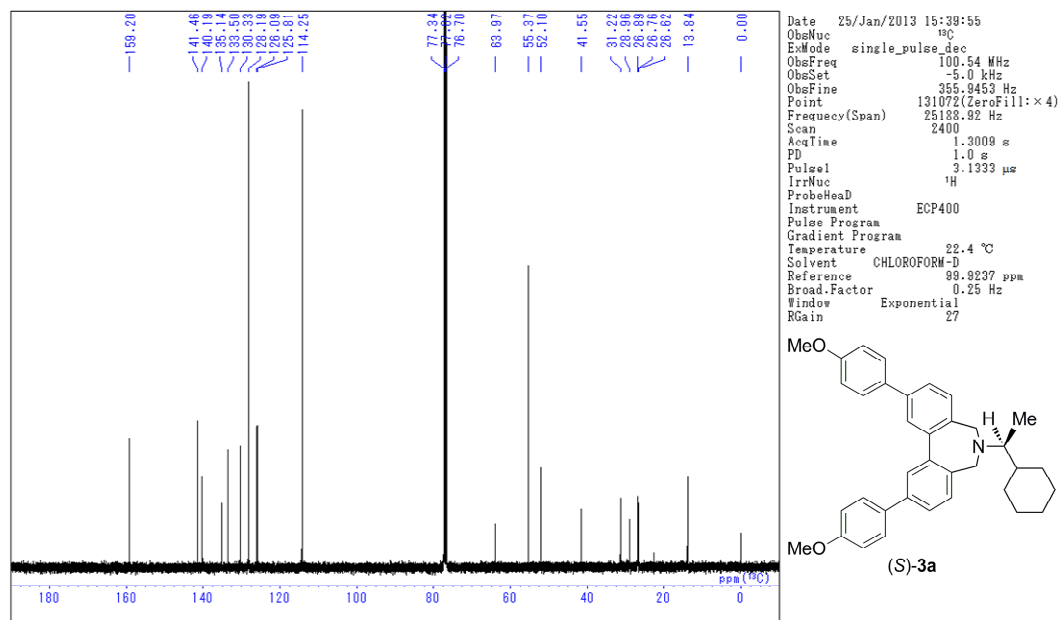

Figure S14.  $^{13}\text{C}$  NMR Spectrum (100 MHz,  $\text{CDCl}_3$ ) of (S)-3a.

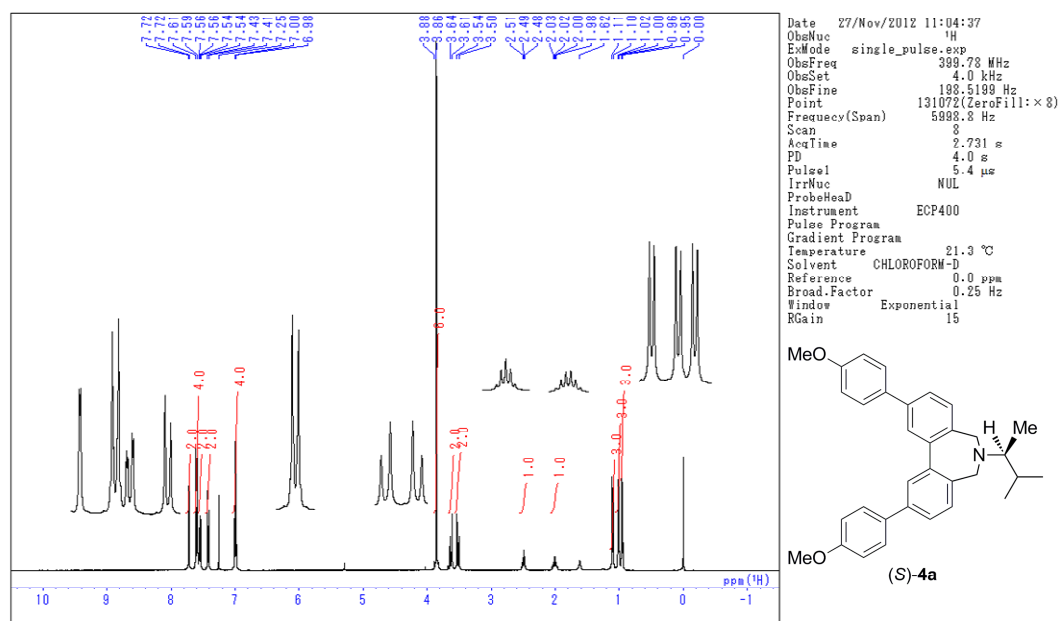

Figure S15.  $^1\text{H}$  NMR Spectrum (400 MHz,  $\text{CDCl}_3$ ) of (S)-4a.

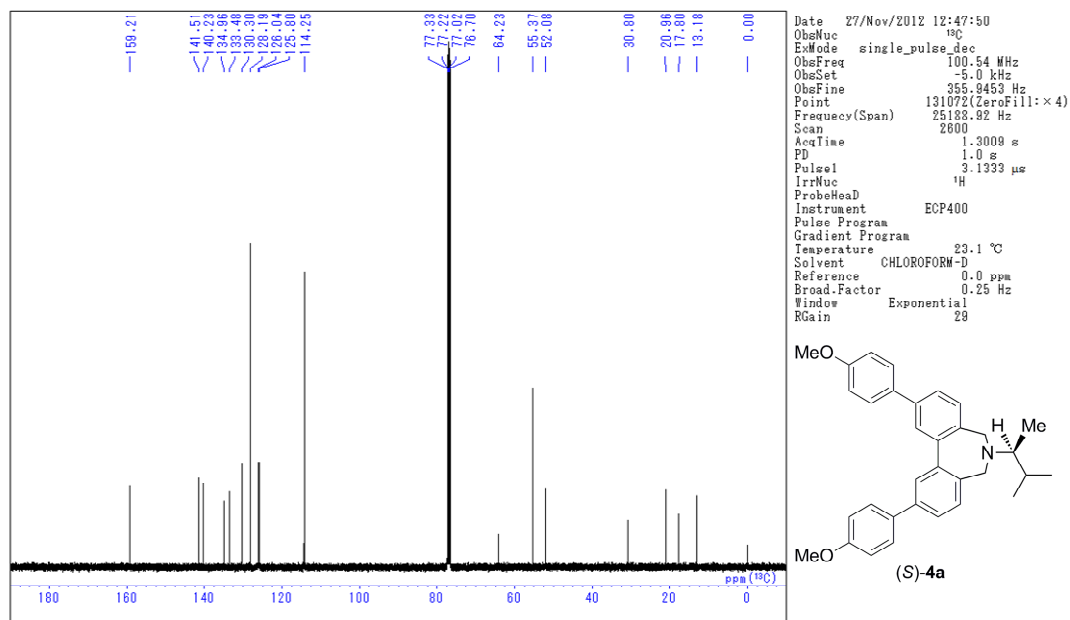

Figure S16.  $^{13}\text{C}$  NMR Spectrum (100 MHz,  $\text{CDCl}_3$ ) of (S)-4a.

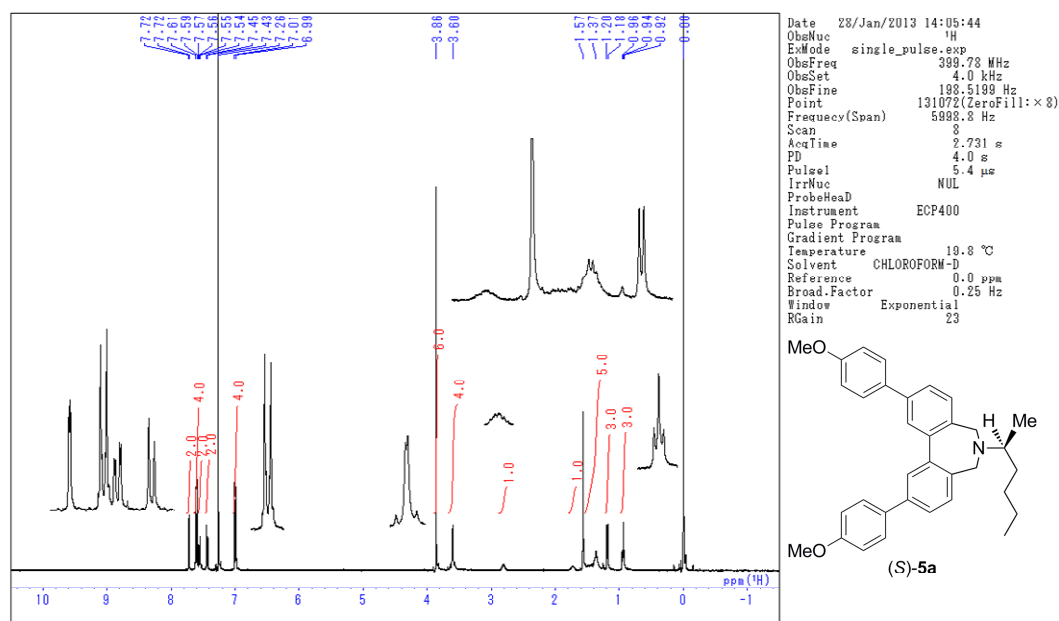

Figure S17.  $^1\text{H}$  NMR Spectrum (400 MHz,  $\text{CDCl}_3$ ) of (S)-5a.

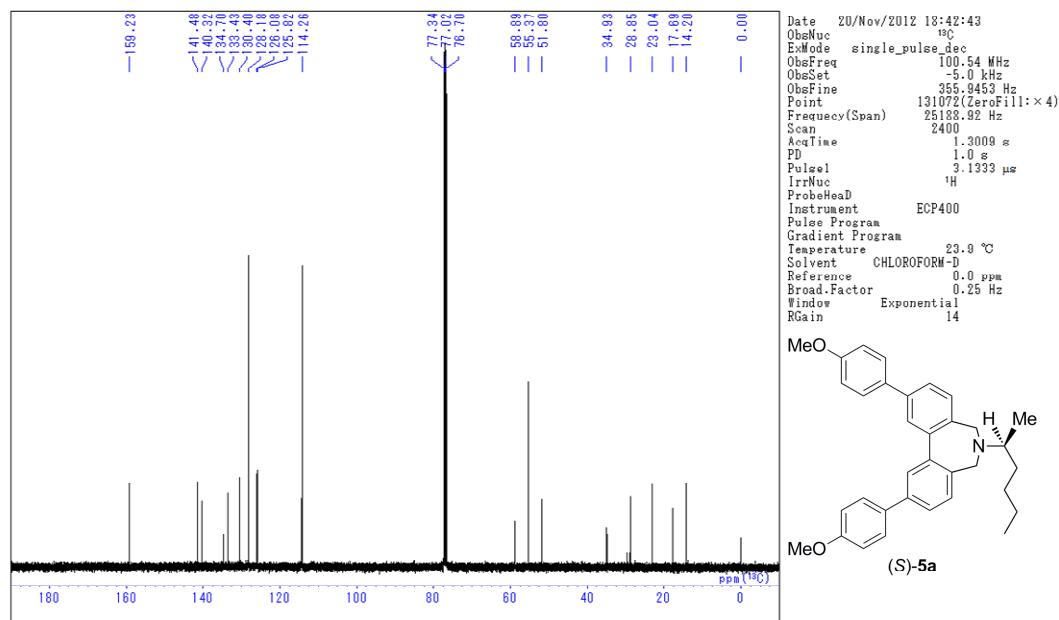

Figure S18.  $^{13}\text{C}$  NMR Spectrum (100 MHz,  $\text{CDCl}_3$ ) of (S)-5a.

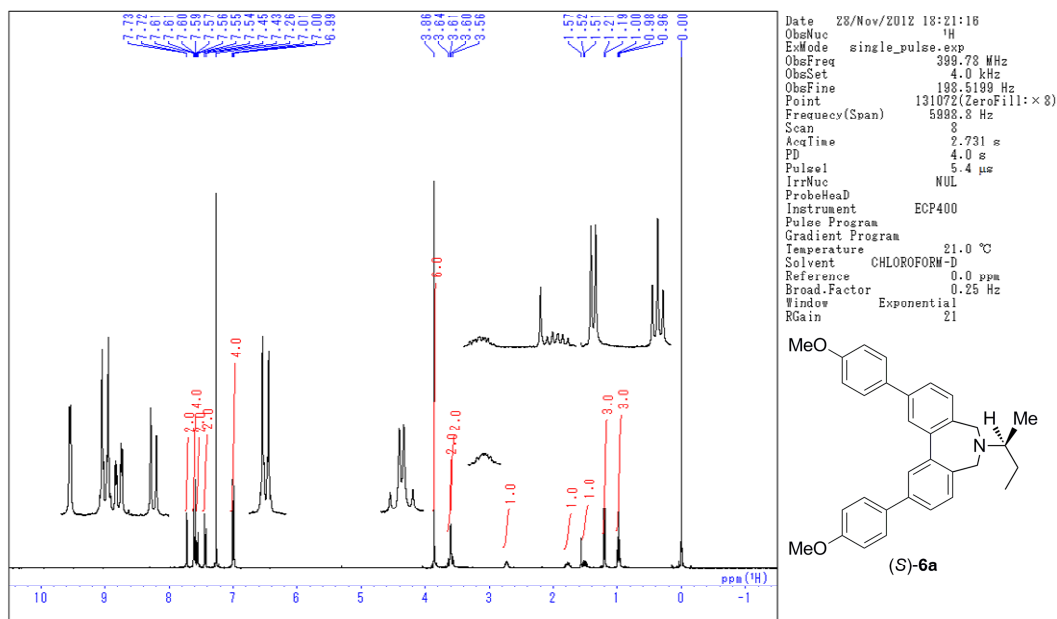

Figure S19.  $^1\text{H}$  NMR Spectrum (400 MHz,  $\text{CDCl}_3$ ) of (S)-6a.

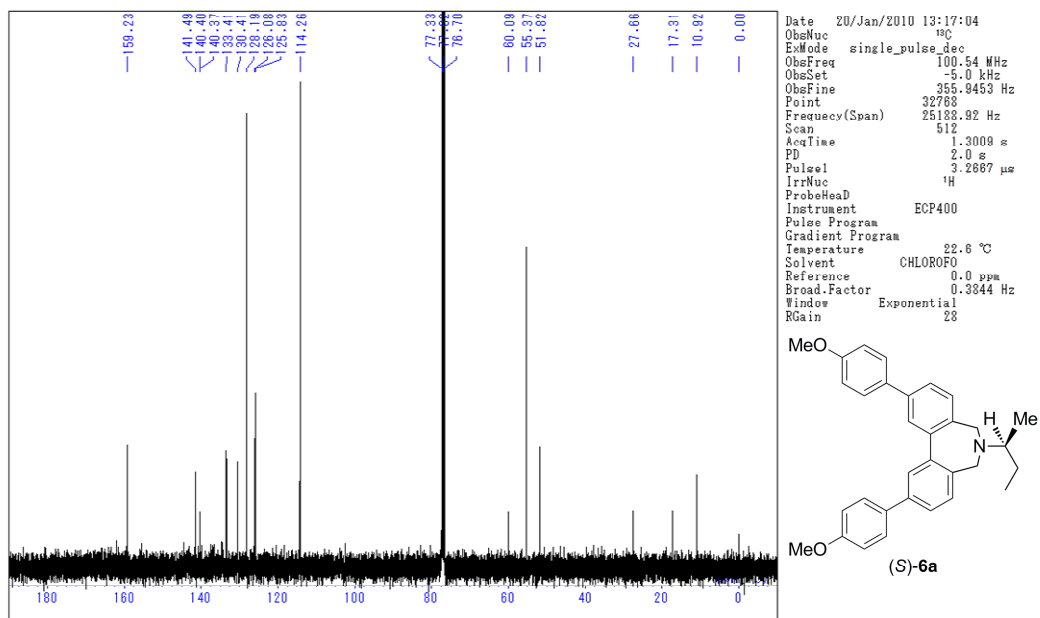

Figure S20.  $^{13}\text{C}$  NMR Spectrum (100 MHz,  $\text{CDCl}_3$ ) of (S)-6a.



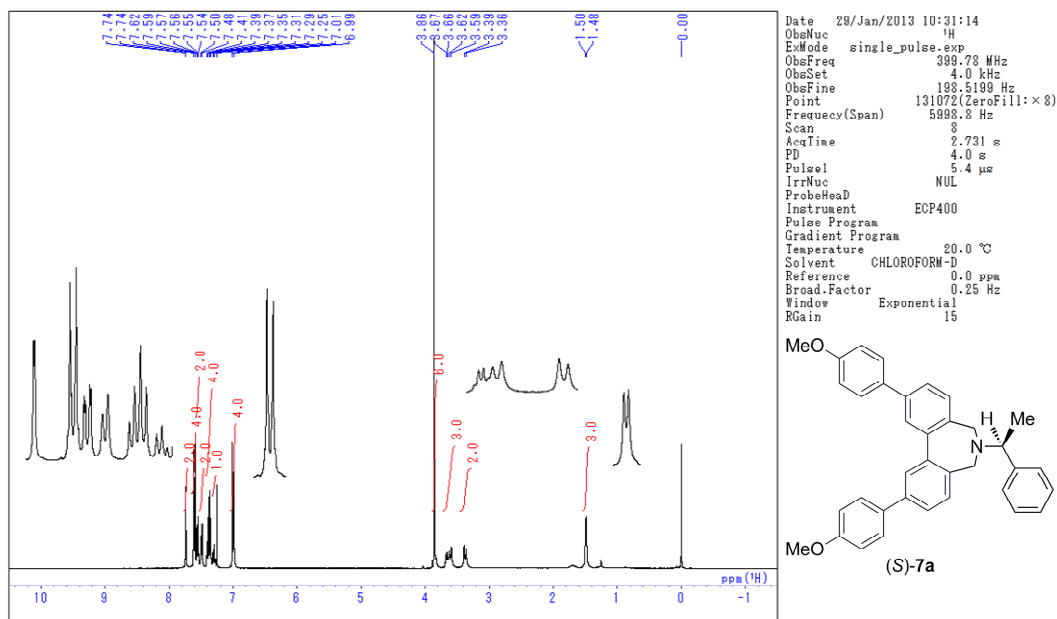

Figure S21.  $^1\text{H}$  NMR Spectrum (400 MHz,  $\text{CDCl}_3$ ) of (S)-7a.

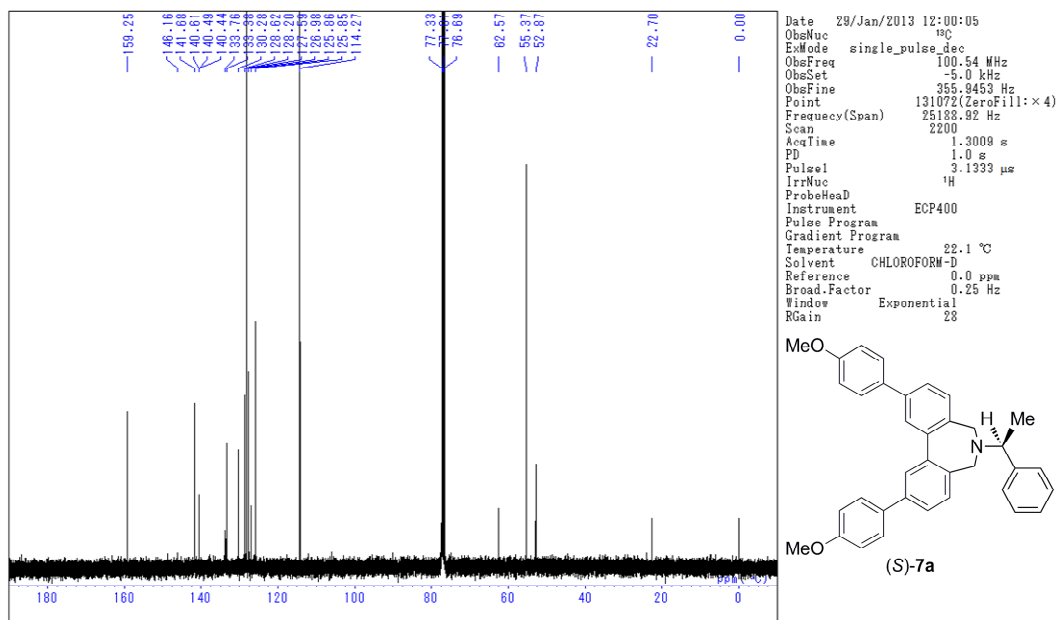

Figure S22.  $^{13}\text{C}$  NMR Spectrum (100 MHz,  $\text{CDCl}_3$ ) of (S)-7a.

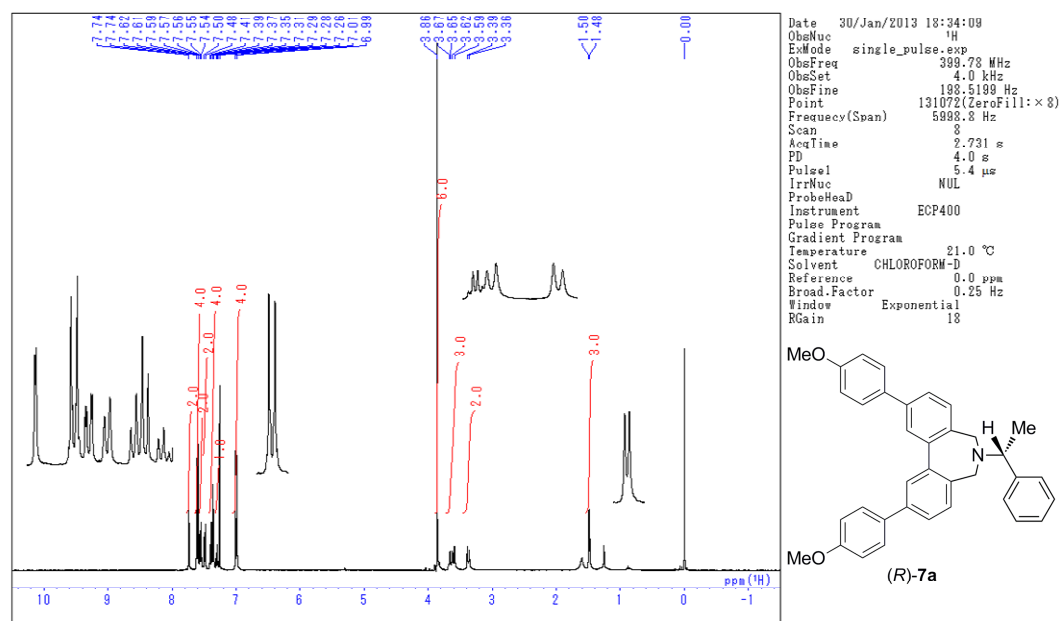

Figure S23.  $^1\text{H}$  NMR Spectrum (400 MHz,  $\text{CDCl}_3$ ) of (R)-7a.

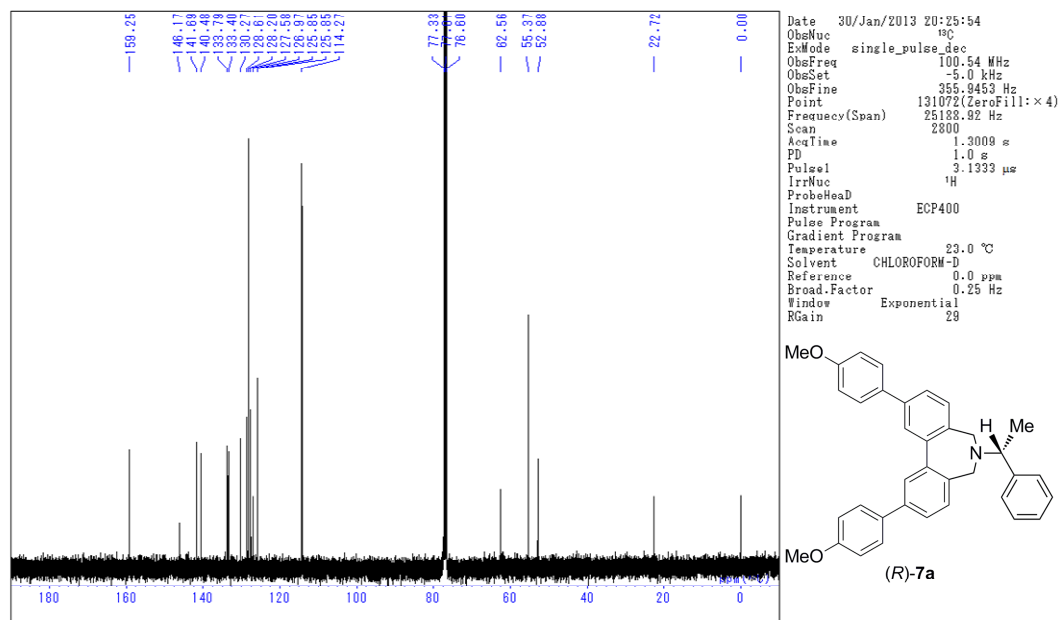

Figure S24.  $^{13}\text{C}$  NMR Spectrum (100 MHz,  $\text{CDCl}_3$ ) of (R)-7a.

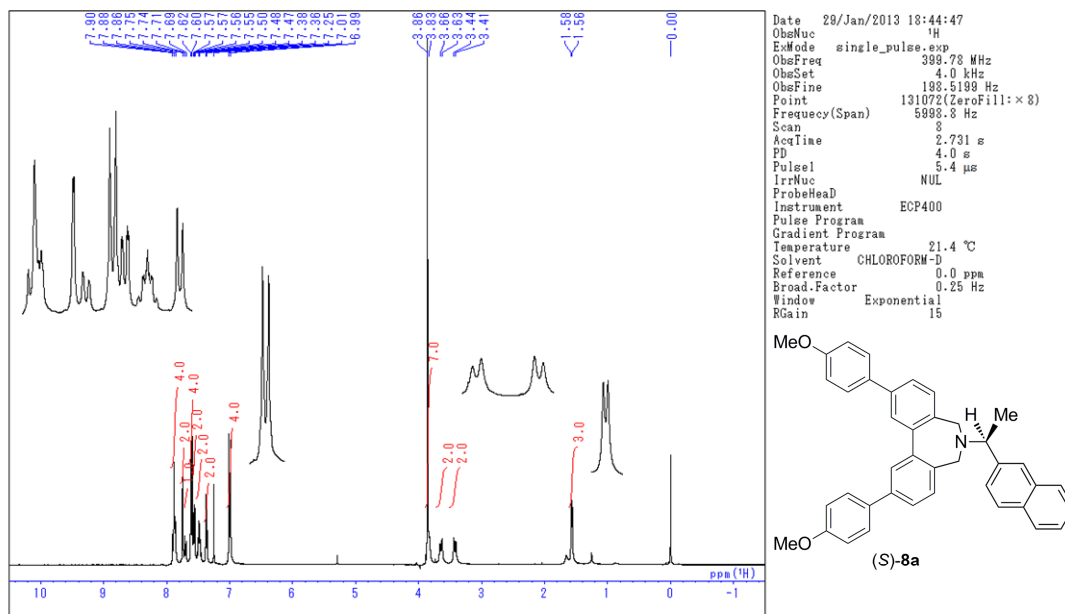

Figure S25.  $^1\text{H}$  NMR Spectrum (400 MHz,  $\text{CDCl}_3$ ) of (S)-8a.

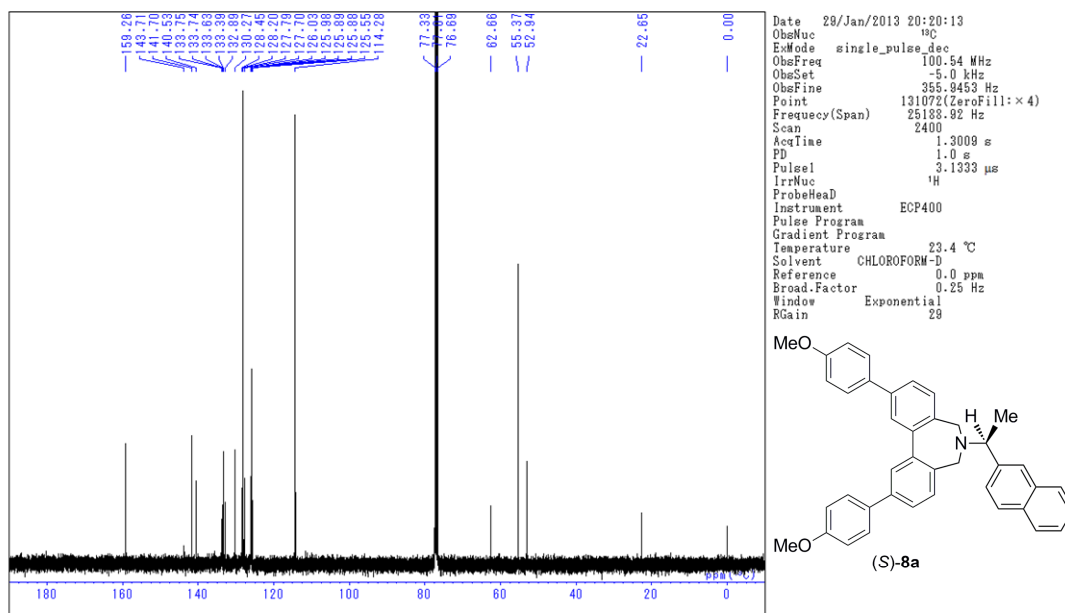

Figure S26.  $^{13}\text{C}$  NMR Spectrum (100 MHz,  $\text{CDCl}_3$ ) of (S)-7a.

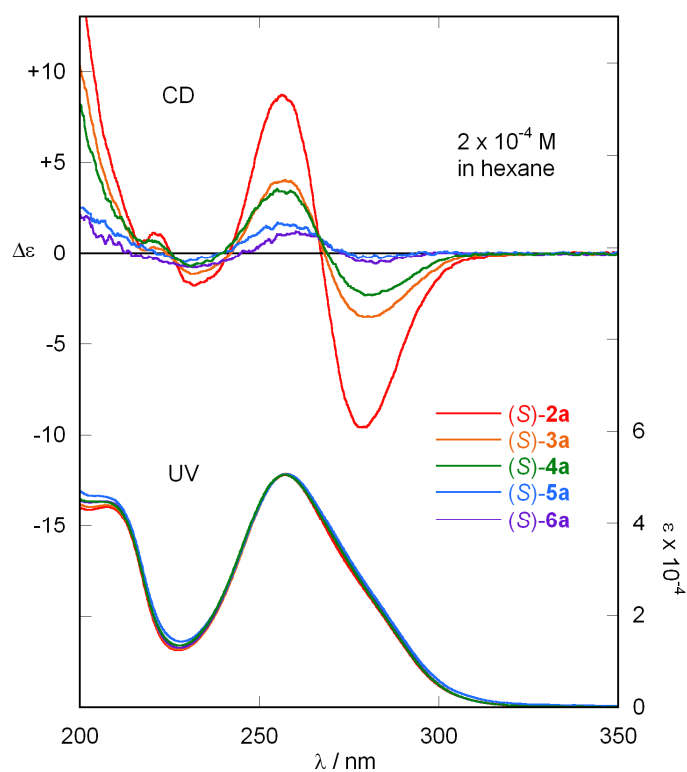

**Figure S27.** CD and UV Spectra of aliphatic amines (*S*)-**2a**–**6a** ( $2 \times 10^{-4}$  M in hexane, 293 K).

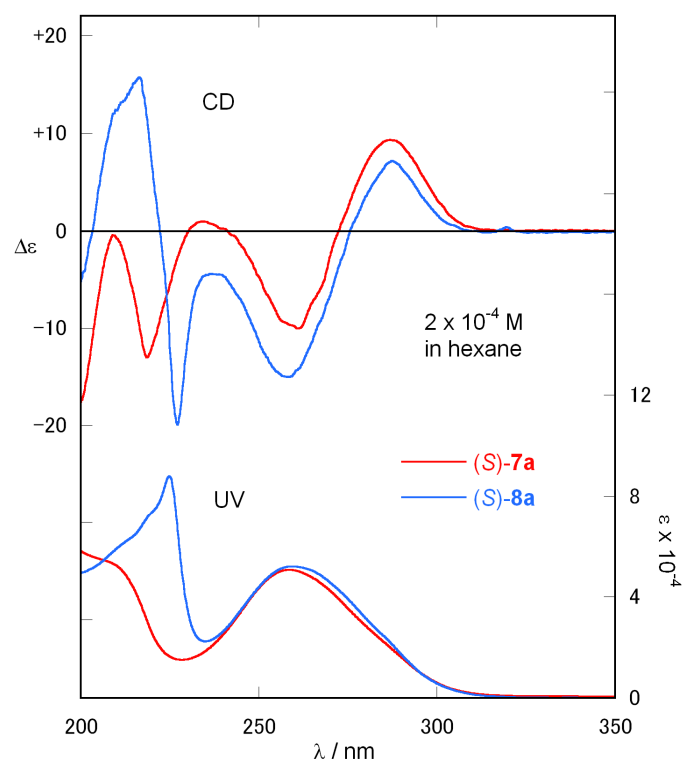

**Figure S28.** CD and UV Spectra of aromatic amines (*S*)-**7a** and (*S*)-**8a** ( $2 \times 10^{-4}$  M in hexane, 293 K).

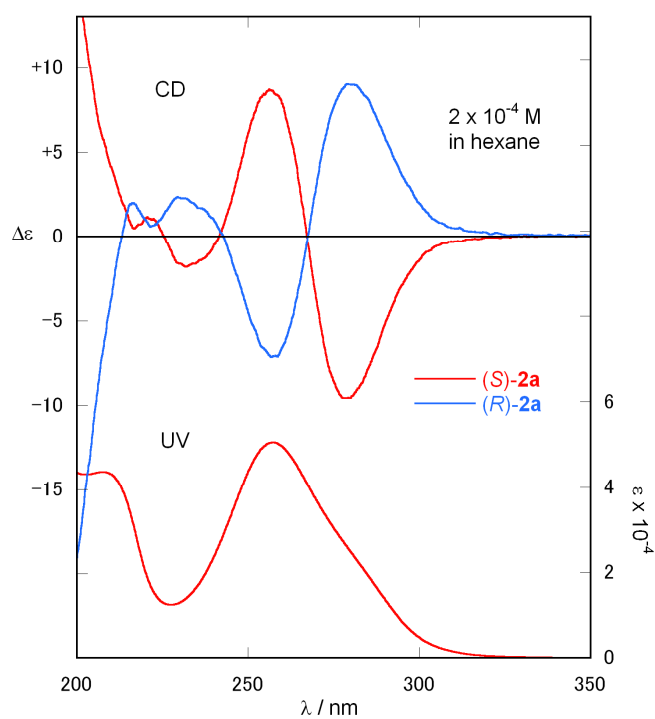

**Figure S29.** CD and UV Spectra of (*S*)-**2a** and (*R*)-**2a** ( $2 \times 10^{-4}$  M in hexane, 293 K).

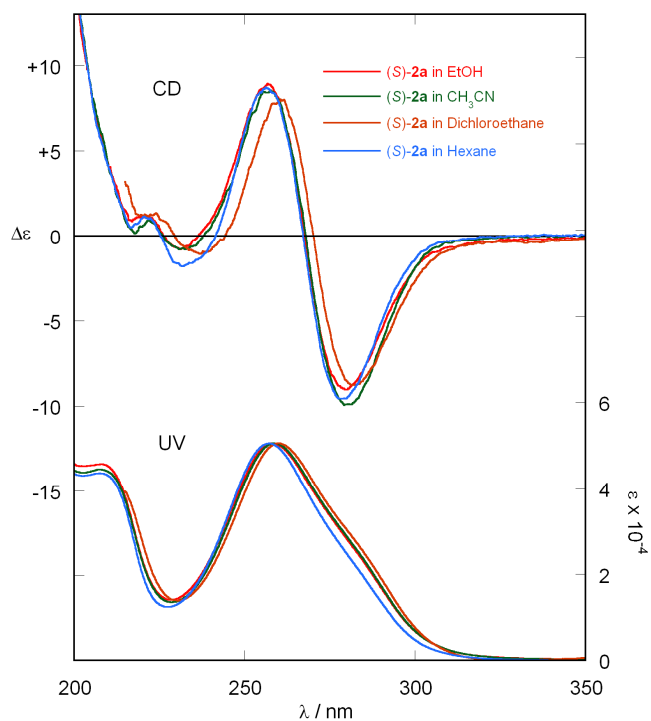

**Figure S30.** CD and UV Spectra of (*S*)-**2a** with varying solvents ( $2 \times 10^{-4}$  M, 293 K).

**Table S1.** CD spectral data of (*S*)-**2a**–(*S*)-**8a**<sup>[a]</sup>.

| Entry | Compound                | $\Delta\epsilon_1^{[b]}$ ( $\lambda$ [nm]) | $\Delta\epsilon_2^{[b]}$ ( $\lambda$ [nm]) | CD amplitude ( $A_{CD}$ value) <sup>[c]</sup> |
|-------|-------------------------|--------------------------------------------|--------------------------------------------|-----------------------------------------------|
| 1     | ( <i>S</i> )- <b>2a</b> | −9.2 (278.8)                               | +8.5 (256.2)                               | −17.7                                         |
| 2     | ( <i>S</i> )- <b>3a</b> | −3.5 (279.4)                               | +4.0 (257.2)                               | −7.5                                          |
| 3     | ( <i>S</i> )- <b>4a</b> | −2.4 (281.4)                               | +3.5 (255.0)                               | −5.9                                          |
| 4     | ( <i>S</i> )- <b>5a</b> | −0.3 (283.6)                               | +1.6 (255.2)                               | −1.9                                          |
| 5     | ( <i>S</i> )- <b>6a</b> | −0.6 (282.6)                               | +1.2 (260.2)                               | −1.8                                          |
| 6     | ( <i>S</i> )- <b>7a</b> | +9.8 (286.8)                               | −10.6 (261.2)                              | +20.4                                         |
| 7     | ( <i>S</i> )- <b>8a</b> | +7.2 (287.4)                               | −15.0 (258.4)                              | +22.2                                         |

[a] All CD data were measured in hexane,  $2 \times 10^{-4}$  M concentration using 1 mm CD cell at 293 K. [b]  $\Delta\epsilon_1$  and  $\Delta\epsilon_2$  are intensities of first and second Cotton effects. [c]  $A_{CD}$  value:  $A_{CD} = \Delta\epsilon_1 - \Delta\epsilon_2$ , where  $\Delta\epsilon_1$  and  $\Delta\epsilon_2$  are intensities of first and second Cotton effects, respectively.

### Theoretical calculations

To obtain the population between *M* and *P* conformers, preliminary conformational searches were run on the structure of (*S*)-**2b**–(*S*)-**4b** and (*S*)-**6b**–(*S*)-**8b** using MMFF. All local minimum conformers were then optimized with DFT using B3LYP/6-31G\* model. The lower energy conformers with relative energies ranging from 0.0 to 3.0 kcal/mol were selected. By the Boltzmann distribution based on the energy difference of the conformers at 293 K, the population of the *M* and *P* conformers were determined. Calculations using HF/6-31G\* also gave similar results.

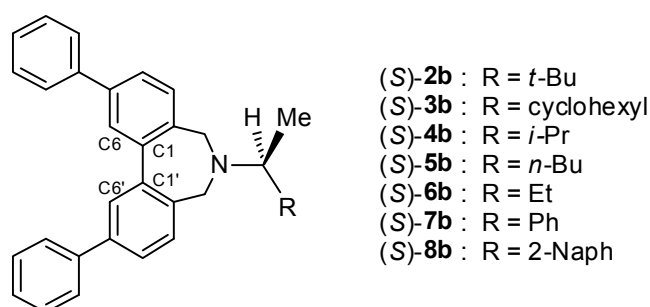**Figure S31.** Methoxy-omitted model of 1-amine conjugates for theoretical calculations.

Theoretical calculations at B3LYP/6-31G\* level

**Table S2.** Calculated conformers of (*S*)-**2b** at B3LYP/6-31G\* level.

| Entry | Conformer | Dihedral angle <sup>[a]</sup> | $\Delta E$ , kcal/mol | $K^{[b]}$ | Population, % |
|-------|-----------|-------------------------------|-----------------------|-----------|---------------|
| 1     | #M3       | -42.75                        | 0.00                  | 1.00      | 42.9          |
| 2     | #M1       | -42.20                        | 0.17                  | 0.75      | 32.3          |
| 3     | #P1       | 43.53                         | 0.32                  | 0.58      | 24.8          |

[a] Dihedral angle of C6-C1-C1'-C6'. [b] Equilibrium constant at 293 K.

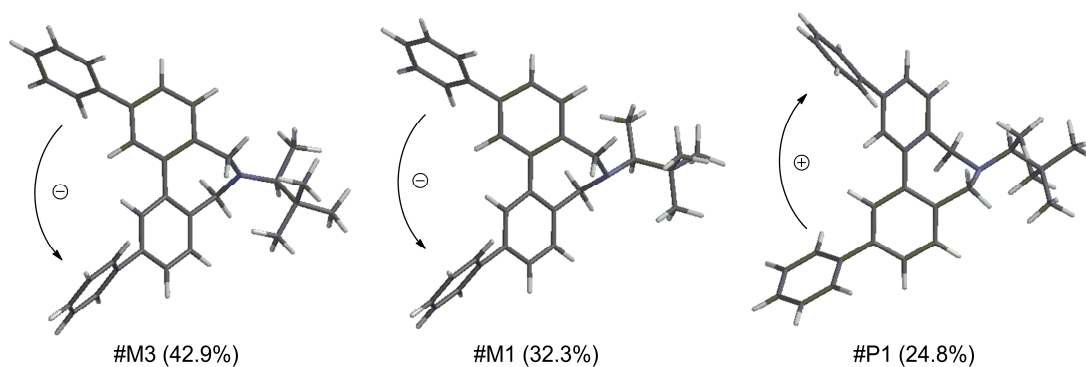

**Figure S32.** Three major conformers of (*S*)-**2b** at B3LYP/6-31G\* level.

**Table S3.** Calculated conformers of (*S*)-**3b** at B3LYP/6-31G\* level.

| Entry | Conformer | Dihedral angle <sup>[a]</sup> | $\Delta E$ , kcal/mol | $K$ <sup>[b]</sup> | Population, % |
|-------|-----------|-------------------------------|-----------------------|--------------------|---------------|
| 1     | #M1       | -42.32                        | 0.00                  | 1.00               | 46.8          |
| 2     | #P1       | 42.86                         | 0.14                  | 0.79               | 36.9          |
| 3     | #P3       | 42.24                         | 1.63                  | 0.06               | 2.9           |
| 4     | #M7       | -42.17                        | 1.66                  | 0.06               | 2.7           |
| 5     | #M5       | -42.65                        | 1.69                  | 0.05               | 2.6           |
| 6     | #M20      | -42.63                        | 1.93                  | 0.04               | 1.7           |
| 7     | #P5       | 43.25                         | 1.97                  | 0.03               | 1.6           |
| 8     | #M3       | -42.78                        | 2.11                  | 0.03               | 1.2           |
| 9     | #P20      | 42.95                         | 2.17                  | 0.02               | 1.1           |
| 10    | #P7       | 43.57                         | 2.21                  | 0.02               | 1.0           |
| 11    | #P9       | 44.15                         | 2.61                  | 0.01               | 0.5           |
| 12    | #M15      | -44.15                        | 2.85                  | 0.01               | 0.4           |
| 13    | #M13      | -43.13                        | 2.86                  | 0.01               | 0.3           |
| 14    | #M9       | -42.33                        | 2.89                  | 0.01               | 0.3           |

[a] Dihedral angle of C6-C1-C1'-C6'. [b] Equilibrium constant at 293 K.

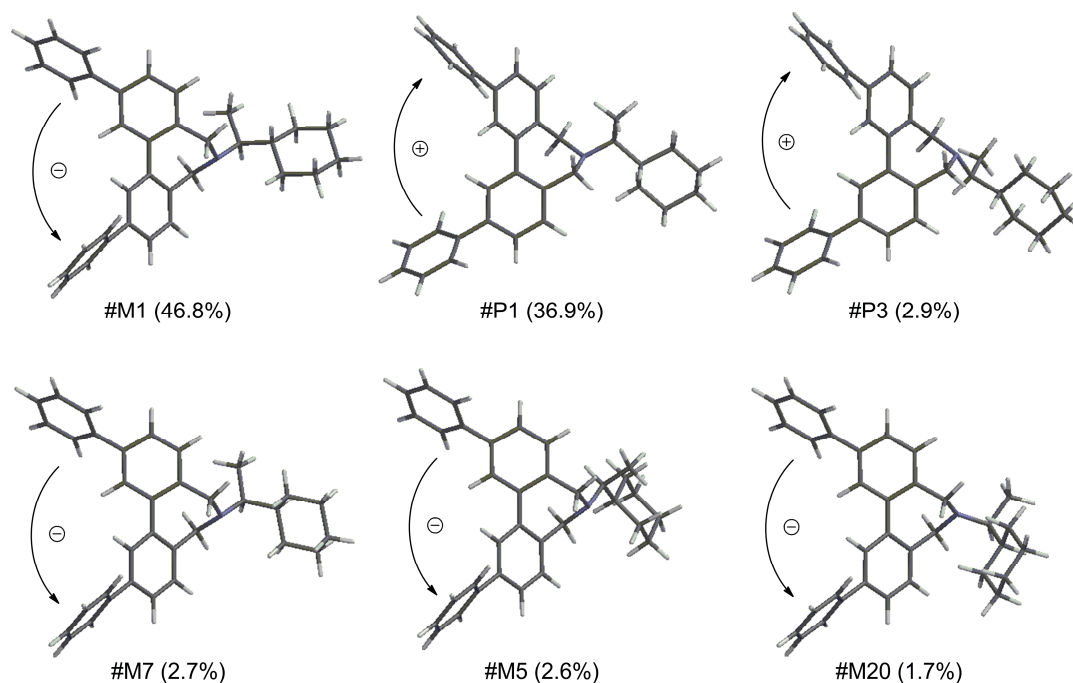

**Figure S33.** Six major conformers of (*S*)-**3b** at B3LYP/6-31G\* level.



**Table S4.** Calculated conformers of (*S*)-**4b** at B3LYP/6-31G\* level.

| Entry | Conformer | Dihedral angle <sup>[a]</sup> | $\Delta E$ , kcal/mol | $K$ <sup>[b]</sup> | Population, % |
|-------|-----------|-------------------------------|-----------------------|--------------------|---------------|
| 1     | #M1       | -42.99                        | 0.00                  | 1.00               | 50.3          |
| 2     | #P1       | 41.67                         | 0.20                  | 0.71               | 35.5          |
| 3     | #P3       | 42.18                         | 1.34                  | 0.10               | 5.1           |
| 4     | #M3       | -42.63                        | 1.44                  | 0.08               | 4.2           |
| 5     | #M5       | -43.14                        | 1.70                  | 0.05               | 2.7           |
| 6     | #P5       | 42.55                         | 2.10                  | 0.03               | 1.4           |
| 7     | #M7       | -42.17                        | 2.70                  | 0.01               | 0.5           |
| 8     | #P7       | 44.46                         | 2.78                  | 0.01               | 0.4           |

[a] Dihedral angle of C6-C1-C1'-C6'. [b] Equilibrium constant at 293 K.

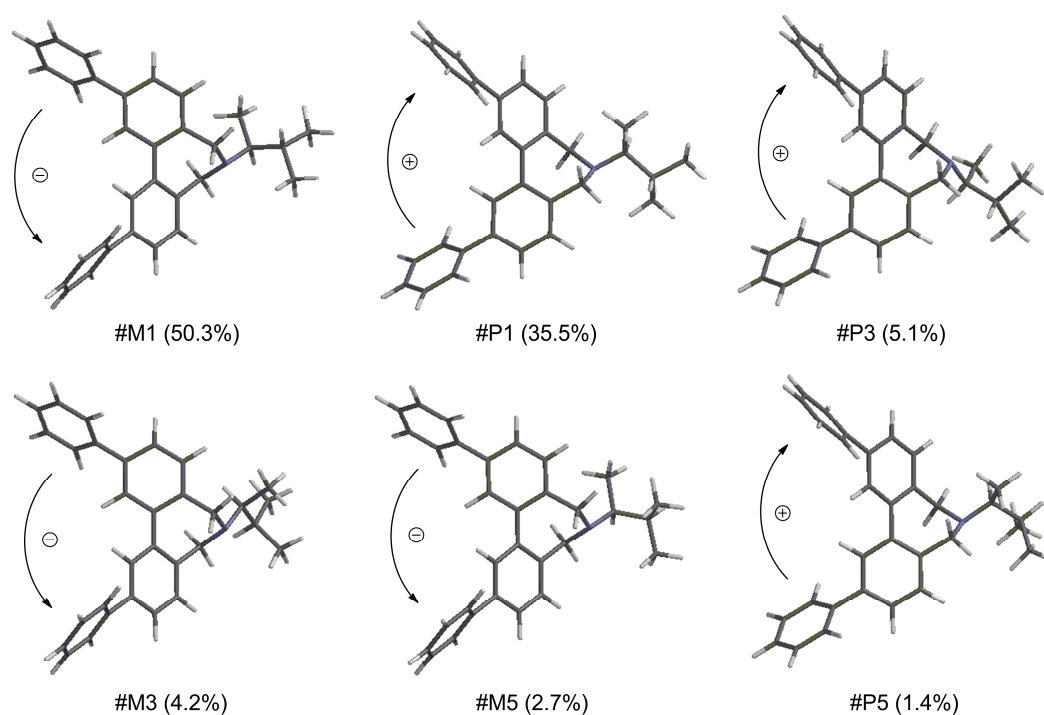

**Figure S34.** Six major conformers of (*S*)-**4b** at B3LYP/6-31G\* level.

**Table S5.** Calculated conformers of (*S*)-**6b** at B3LYP/6-31G\* level.

| Entry | Conformer | Dihedral angle <sup>[a]</sup> | $\Delta E$ , kcal/mol | $K$ <sup>[b]</sup> | Population, % |
|-------|-----------|-------------------------------|-----------------------|--------------------|---------------|
| 1     | #M1       | -42.56                        | 0.00                  | 1.00               | 35.5          |
| 2     | #P1       | 43.48                         | 0.18                  | 0.74               | 26.2          |
| 3     | #P5       | 41.94                         | 0.79                  | 0.26               | 9.1           |
| 4     | #M5       | -43.25                        | 0.91                  | 0.21               | 7.4           |
| 5     | #P7       | 42.96                         | 1.03                  | 0.17               | 6.1           |
| 6     | #M7       | -41.95                        | 1.12                  | 0.15               | 5.2           |
| 7     | #M3       | -43.35                        | 1.32                  | 0.10               | 3.7           |
| 8     | #P3       | 43.56                         | 1.36                  | 0.10               | 3.4           |
| 9     | #P9       | 42.47                         | 1.88                  | 0.04               | 1.4           |
| 10    | #P11      | 42.76                         | 2.12                  | 0.03               | 0.9           |
| 11    | #M9       | -41.92                        | 2.28                  | 0.02               | 0.7           |
| 12    | #M11      | -43.63                        | 2.58                  | 0.01               | 0.4           |

[a] Dihedral angle of C6-C1-C1'-C6'. [b] Equilibrium constant at 293 K.

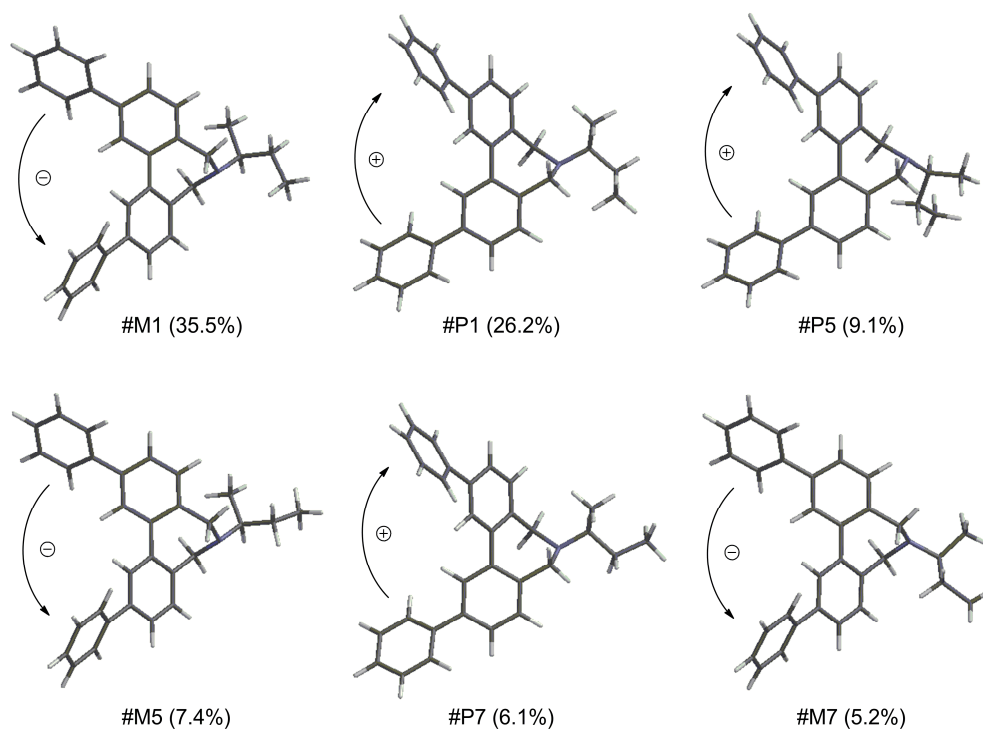

**Figure S35.** Six major conformers of (*S*)-**6b** at B3LYP/6-31G\* level.

**Table S6.** Calculated conformers of (*S*)-**7b** at B3LYP/6-31G\* level.

| Entry | Conformer | Dihedral angle <sup>[a]</sup> | $\Delta E$ , kcal/mol | $K$ <sup>[b]</sup> | Population, % |
|-------|-----------|-------------------------------|-----------------------|--------------------|---------------|
| 1     | #P1       | 42.27                         | 0.00                  | 1.00               | 66.7          |
| 2     | #M1       | -42.94                        | 0.49                  | 0.43               | 28.5          |
| 3     | #M5       | -42.64                        | 1.91                  | 0.04               | 2.5           |
| 4     | #P3       | 42.66                         | 1.96                  | 0.03               | 2.3           |

[a] Dihedral angle of C6-C1-C1'-C6'. [b] Equilibrium constant at 293 K.

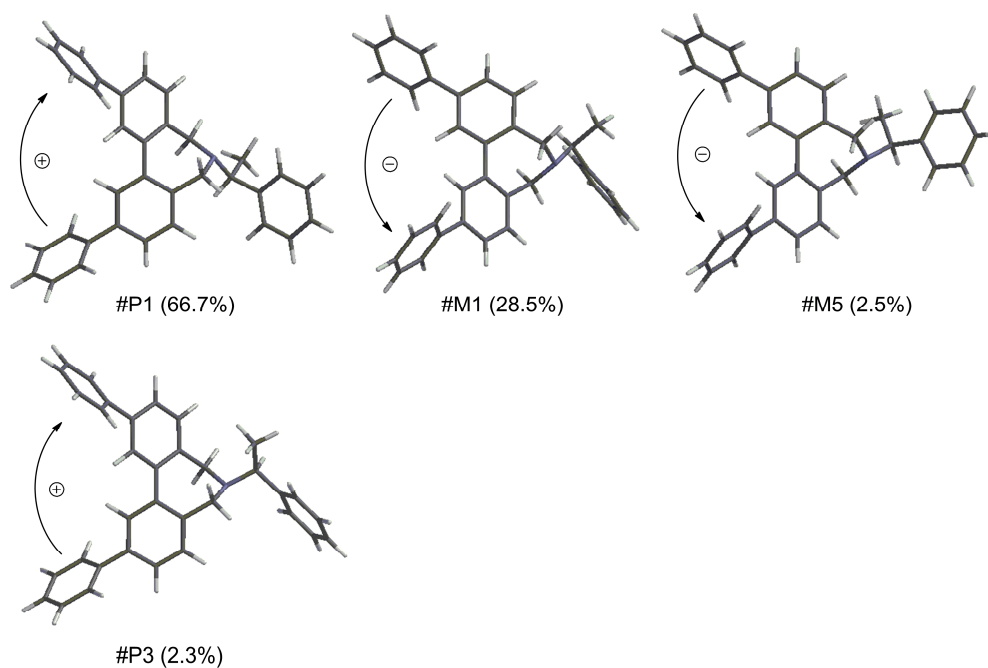

**Figure S36.** Four major conformers of (*S*)-**6b** at B3LYP/6-31G\* level.

**Table S7.** Calculated conformers of (*S*)-**8b** at B3LYP/6-31G\* level.

| Entry | Conformer | Dihedral angle <sup>[a]</sup> | $\Delta E$ , kcal/mol | $K$ <sup>[b]</sup> | Population, % |
|-------|-----------|-------------------------------|-----------------------|--------------------|---------------|
| 1     | #P1       | 43.06                         | 0.00                  | 1.00               | 39.5          |
| 2     | #P3       | 41.89                         | 0.06                  | 0.90               | 35.7          |
| 3     | #M3       | -41.45                        | 0.78                  | 0.26               | 10.3          |
| 4     | #M1       | -43.24                        | 0.86                  | 0.23               | 9.0           |
| 5     | #M7       | -42.87                        | 1.43                  | 0.09               | 3.4           |
| 6     | #P5       | 43.86                         | 1.70                  | 0.05               | 2.1           |

[a] Dihedral angle of C6-C1-C1'-C6'. [b] Equilibrium constant at 293 K.

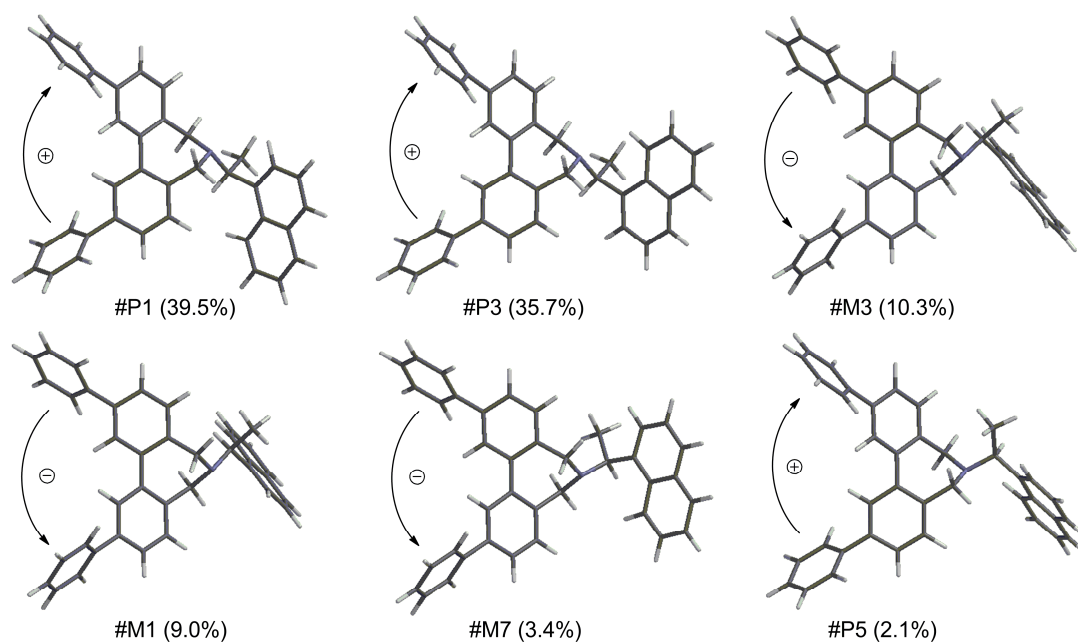

**Figure S37.** Six major conformers of (*S*)-**6b** at B3LYP/6-31G\* level.

**Table S8.** Comparison of the excess of *M* conformer and observed CD amplitude at B3LYP/6-31G\* level.

| Entry | Compound                | Calculated ratio ( <i>M</i> / <i>P</i> ) | Excess of <i>M</i> conformer, % <sup>[a]</sup> | Observed CD amplitude ( <i>A</i> <sub>CD</sub> value) <sup>[b]</sup> |
|-------|-------------------------|------------------------------------------|------------------------------------------------|----------------------------------------------------------------------|
| 1     | ( <i>S</i> )- <b>2b</b> | 75.2:24.8                                | 50.4                                           | -17.7 (( <i>S</i> )- <b>2a</b> )                                     |
| 2     | ( <i>S</i> )- <b>3b</b> | 56.0:44.0                                | 12.0                                           | -7.5 (( <i>S</i> )- <b>3a</b> )                                      |
| 3     | ( <i>S</i> )- <b>4b</b> | 57.6:42.4                                | 15.2                                           | -5.9 (( <i>S</i> )- <b>4a</b> )                                      |
| 4     | ( <i>S</i> )- <b>6b</b> | 52.8:47.2                                | 5.6                                            | -1.8 (( <i>S</i> )- <b>6a</b> )                                      |
| 5     | ( <i>S</i> )- <b>7b</b> | 31.0:69.0                                | -38.0                                          | +20.4 (( <i>S</i> )- <b>7a</b> )                                     |
| 6     | ( <i>S</i> )- <b>8b</b> | 22.7:77.3                                | -54.6                                          | +22.2 (( <i>S</i> )- <b>8a</b> )                                     |

[a] Excess of *M* conformer (%) =  $([M] - [P]) / ([M] + [P]) \times 100$ , where [*M*] and [*P*] are the amounts of *M* and *P* conformers calculated by B3LYP/6-31G\*. [b] *A*<sub>CD</sub> value:  $A_{CD} = \Delta\epsilon_1 - \Delta\epsilon_2$ , where  $\Delta\epsilon_1$  and  $\Delta\epsilon_2$  are intensities of first and second Cotton effects, respectively.

#### Theoretical calculations at HF/6-31G\* level

**Table S9.** Calculated conformers of (*S*)-**2b** at HF/6-31G\* level.

| Entry | Conformer | Dihedral angle <sup>[a]</sup> | $\Delta E$ , kcal/mol | <i>K</i> <sup>[b]</sup> | Population, % |
|-------|-----------|-------------------------------|-----------------------|-------------------------|---------------|
| 1     | #M1       | -44.26                        | 0.00                  | 1.00                    | 67.8          |
| 2     | #P1       | 45.25                         | 0.43                  | 0.47                    | 32.2          |

[a] Dihedral angle of C6-C1'-C1'-C6'. [b] Equilibrium constant at 293 K.

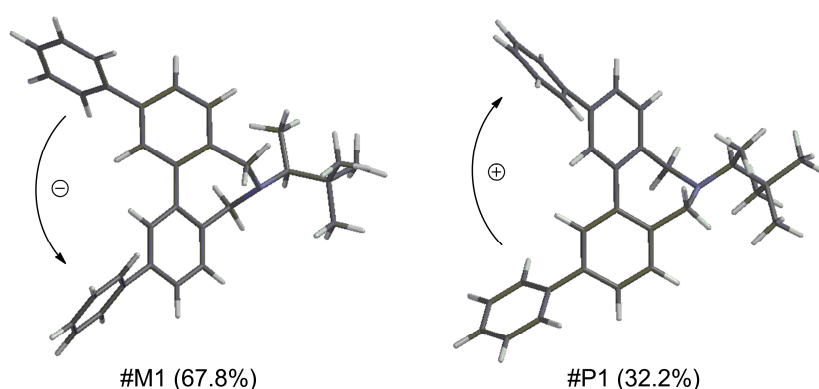

**Figure S38.** Two major conformers of (*S*)-**2b** at HF/6-31G\* level.

**Table S10.** Calculated conformers of (*S*)-**3b** at HF/6-31G\* level.

| Entry | Conformer | Dihedral angle <sup>[a]</sup> | $\Delta E$ , kcal/mol | $K$ <sup>[b]</sup> | Population, % |
|-------|-----------|-------------------------------|-----------------------|--------------------|---------------|
| 1     | #M1       | -44.47                        | 0.00                  | 1.00               | 54.8          |
| 2     | #P1       | 44.69                         | 0.22                  | 0.69               | 37.6          |
| 3     | #M7       | -44.34                        | 1.86                  | 0.04               | 2.2           |
| 4     | #P3       | 44.78                         | 2.15                  | 0.02               | 1.4           |
| 5     | #P20      | 45.23                         | 2.16                  | 0.02               | 1.3           |
| 6     | #M18      | -44.46                        | 2.40                  | 0.02               | 0.9           |
| 7     | #P5       | 44.61                         | 2.61                  | 0.01               | 0.6           |
| 8     | #M5       | -44.14                        | 2.66                  | 0.01               | 0.6           |
| 9     | #P9       | 45.27                         | 2.96                  | 0.01               | 0.3           |
| 10    | #M9       | -44.27                        | 2.98                  | 0.01               | 0.3           |

[a] Dihedral angle of C6-C1-C1'-C6'. [b] Equilibrium constant at 293 K.

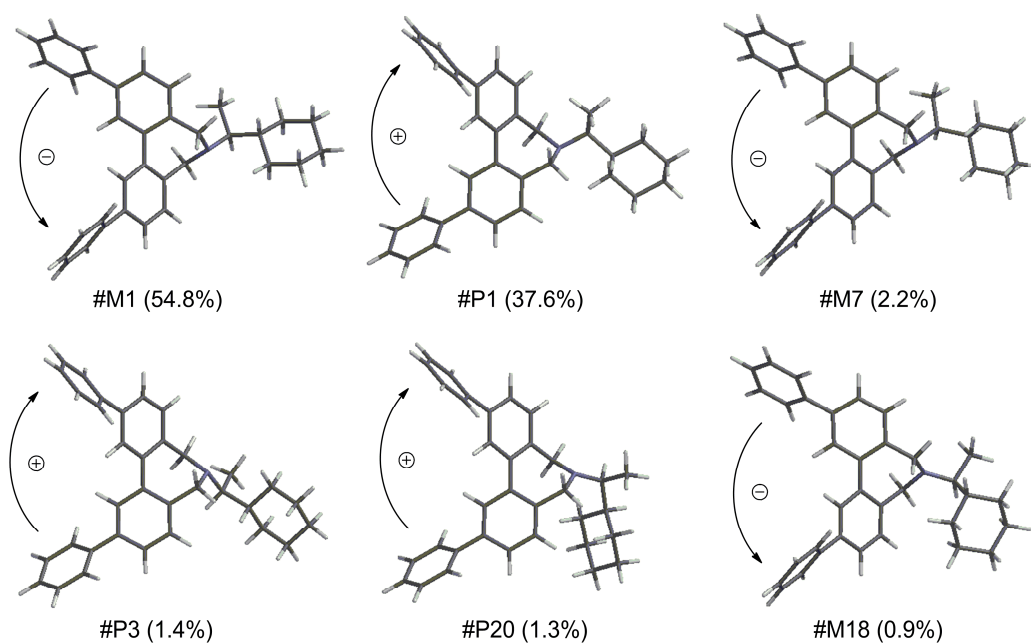

**Figure S39.** Six major conformers of (*S*)-**3b** at HF/6-31G\* level.

**Table S11.** Calculated conformers of (*S*)-**4b** at HF/6-31G\* level.

| Entry | Conformer | Dihedral angle <sup>[a]</sup> | $\Delta E$ , kcal/mol | $K$ <sup>[b]</sup> | Population, % |
|-------|-----------|-------------------------------|-----------------------|--------------------|---------------|
| 1     | #M1       | -44.48                        | 0.00                  | 1.00               | 54.9          |
| 2     | #P1       | 44.70                         | 0.23                  | 0.68               | 37.2          |
| 3     | #M5       | -44.37                        | 1.76                  | 0.05               | 2.7           |
| 4     | #P3       | 44.80                         | 1.94                  | 0.04               | 2.0           |
| 5     | #P5       | 45.24                         | 2.08                  | 0.03               | 1.5           |
| 6     | #M3       | -44.16                        | 2.40                  | 0.02               | 0.9           |
| 7     | #M7       | -44.29                        | 2.80                  | 0.01               | 0.4           |
| 8     | #P7       | 45.21                         | 2.92                  | 0.01               | 0.4           |

[a] Dihedral angle of C6-C1-C1'-C6'. [b] Equilibrium constant at 293 K.

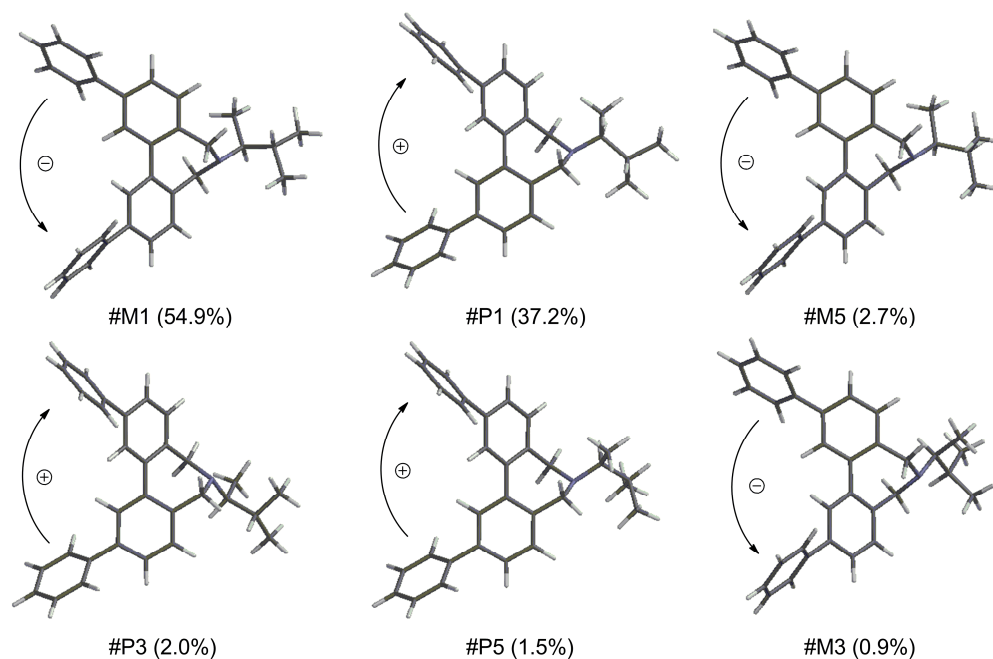

**Figure S40.** Six major conformers of (*S*)-**4b** at HF/6-31G\* level.

**Table S12.** Calculated conformers of (*S*)-**6b** at HF/6-31G\* level.

| Entry | Conformer | Dihedral angle <sup>[a]</sup> | $\Delta E$ , kcal/mol | $K$ <sup>[b]</sup> | Population, % |
|-------|-----------|-------------------------------|-----------------------|--------------------|---------------|
| 1     | #M1       | -44.48                        | 0.00                  | 1.00               | 40.9          |
| 2     | #P1       | 44.69                         | 0.17                  | 0.75               | 30.8          |
| 3     | #M5       | -44.45                        | 0.97                  | 0.19               | 7.7           |
| 4     | #P5       | 44.52                         | 1.04                  | 0.17               | 6.9           |
| 5     | #P7       | 44.57                         | 1.21                  | 0.13               | 5.1           |
| 6     | #M7       | -44.54                        | 1.31                  | 0.11               | 4.3           |
| 7     | #P3       | 44.42                         | 1.96                  | 0.03               | 1.4           |
| 8     | #M3       | -44.36                        | 1.99                  | 0.03               | 1.3           |
| 9     | #P11      | 44.95                         | 2.36                  | 0.02               | 0.7           |
| 10    | #P9       | 44.70                         | 2.50                  | 0.01               | 0.6           |
| 11    | #M11      | -44.68                        | 2.91                  | 0.01               | 0.3           |

[a] Dihedral angle of C6-C1-C1'-C6'. [b] Equilibrium constant at 293 K.

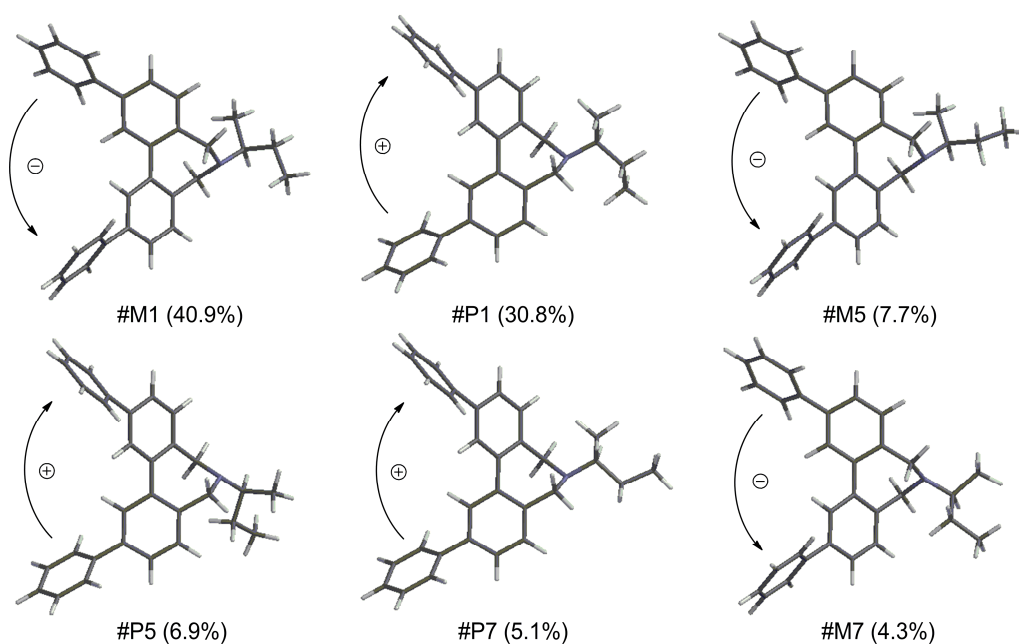

**Figure S41.** Six major conformers of (*S*)-**6b** at HF/6-31G\* level.



**Table S13.** Calculated conformers of (*S*)-**7b** at HF/6-31G\* level.

| Entry | Conformer | Dihedral angle <sup>[a]</sup> | $\Delta E$ , kcal/mol | $K$ <sup>[b]</sup> | Population, % |
|-------|-----------|-------------------------------|-----------------------|--------------------|---------------|
| 1     | #P1       | 44.59                         | 0.00                  | 1.00               | 78.6          |
| 2     | #M1       | -44.58                        | 0.92                  | 0.21               | 16.3          |
| 3     | #M5       | -44.69                        | 1.93                  | 0.04               | 2.8           |
| 4     | #P3       | 44.72                         | 2.07                  | 0.03               | 2.2           |

[a] Dihedral angle of C6-C1-C1'-C6'. [b] Equilibrium constant at 293 K.

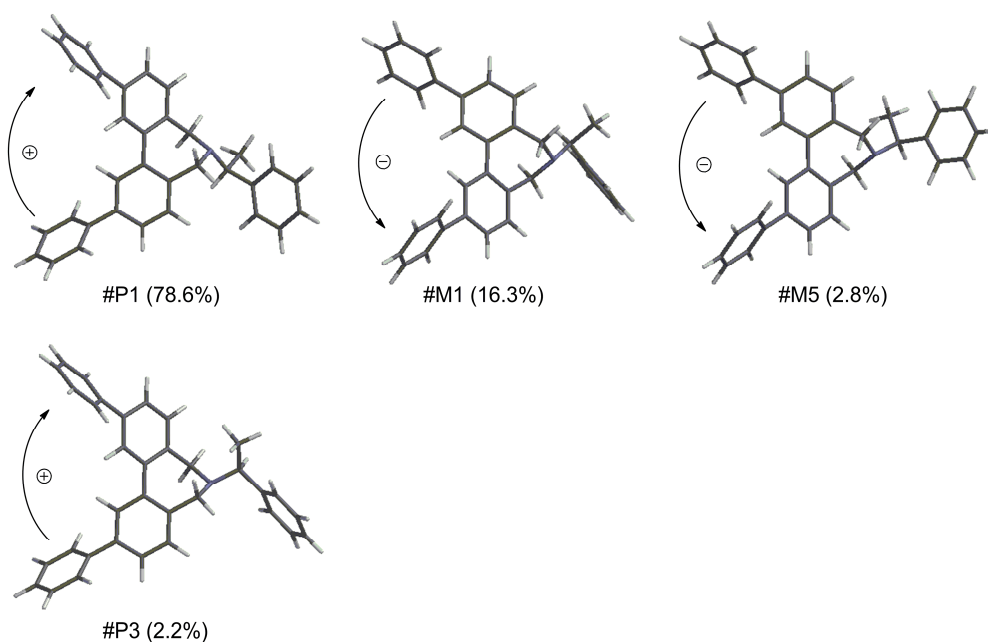

**Figure S42.** Four major conformers of (*S*)-**7b** at HF/6-31G\* level.

**Table S14.** Calculated conformers of (*S*)-**8b** at HF/6-31G\* level.

| Entry | Conformer | Dihedral angle <sup>[a]</sup> | $\Delta E$ , kcal/mol | $K$ <sup>[b]</sup> | Population, % |
|-------|-----------|-------------------------------|-----------------------|--------------------|---------------|
| 1     | #P1       | 44.70                         | 0.00                  | 1.00               | 41.8          |
| 2     | #P3       | 44.52                         | 0.10                  | 0.84               | 35.1          |
| 3     | #M3       | -44.64                        | 0.83                  | 0.24               | 10.0          |
| 4     | #M1       | -44.55                        | 1.22                  | 0.12               | 5.2           |
| 5     | #M7       | -44.65                        | 1.34                  | 0.10               | 4.2           |
| 6     | #P5       | 44.60                         | 1.40                  | 0.09               | 3.8           |

[a] Dihedral angle of C6-C1-C1'-C6'. [b] Equilibrium constant at 293 K.

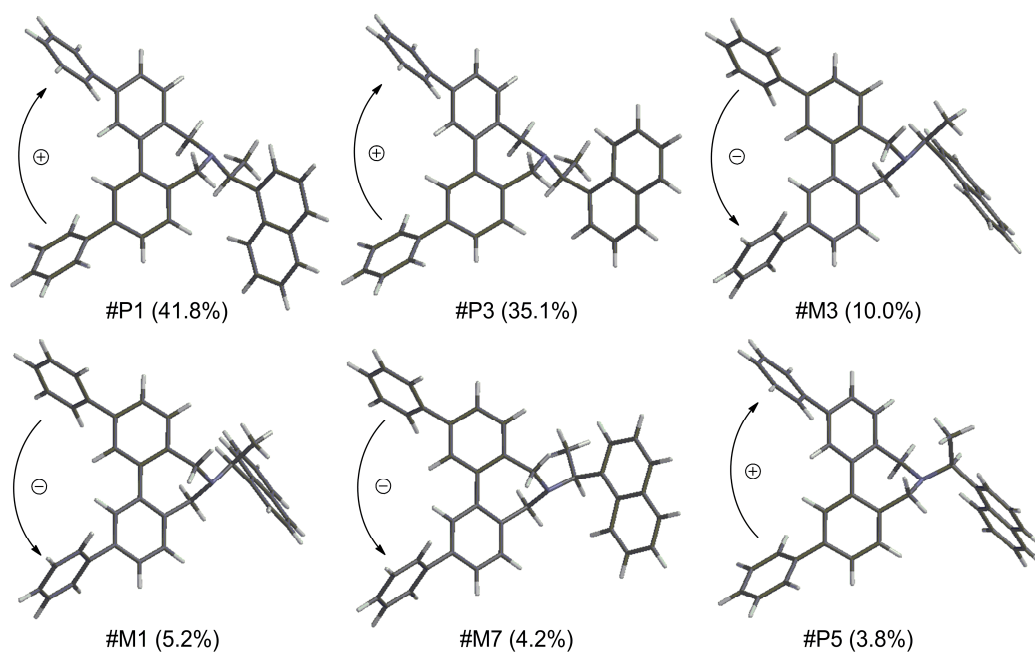

**Figure S43.** Six major conformers of (*S*)-**8b** at HF/6-31G\* level.

**Table S15.** Comparison of the excess of *M* conformer and observed CD amplitude at HF/6-31G\* level.

| Entry | Compound                | Calculated ratio ( <i>M</i> / <i>P</i> ) | Excess of <i>M</i> conformer, % <sup>[a]</sup> | Observed CD amplitude ( <i>A</i> <sub>CD</sub> value) <sup>[b]</sup> |
|-------|-------------------------|------------------------------------------|------------------------------------------------|----------------------------------------------------------------------|
| 1     | ( <i>S</i> )- <b>2b</b> | 67.8:32.2                                | 35.6                                           | −17.7 (( <i>S</i> )- <b>2a</b> )                                     |
| 2     | ( <i>S</i> )- <b>3b</b> | 58.8:41.2                                | 17.6                                           | −7.5 (( <i>S</i> )- <b>3a</b> )                                      |
| 3     | ( <i>S</i> )- <b>4b</b> | 58.9:41.1                                | 17.8                                           | −5.9 (( <i>S</i> )- <b>4a</b> )                                      |
| 4     | ( <i>S</i> )- <b>6b</b> | 54.5:45.5                                | 9.0                                            | −1.8 (( <i>S</i> )- <b>6a</b> )                                      |
| 5     | ( <i>S</i> )- <b>7b</b> | 19.1:80.9                                | −61.8                                          | +20.4 (( <i>S</i> )- <b>7a</b> )                                     |
| 6     | ( <i>S</i> )- <b>8b</b> | 19.3:80.7                                | −61.4                                          | +22.2 (( <i>S</i> )- <b>8a</b> )                                     |

[a] Excess of *M* conformer (%) =  $([M] - [P]) / ([M] + [P]) \times 100$ , where [*M*] and [*P*] are the amounts of *M* and *P* conformers calculated by HF/6-31G\*. [b] *A*<sub>CD</sub> value:  $A_{CD} = \Delta\epsilon_1 - \Delta\epsilon_2$ , where  $\Delta\epsilon_1$  and  $\Delta\epsilon_2$  are intensities of first and second Cotton effects, respectively.

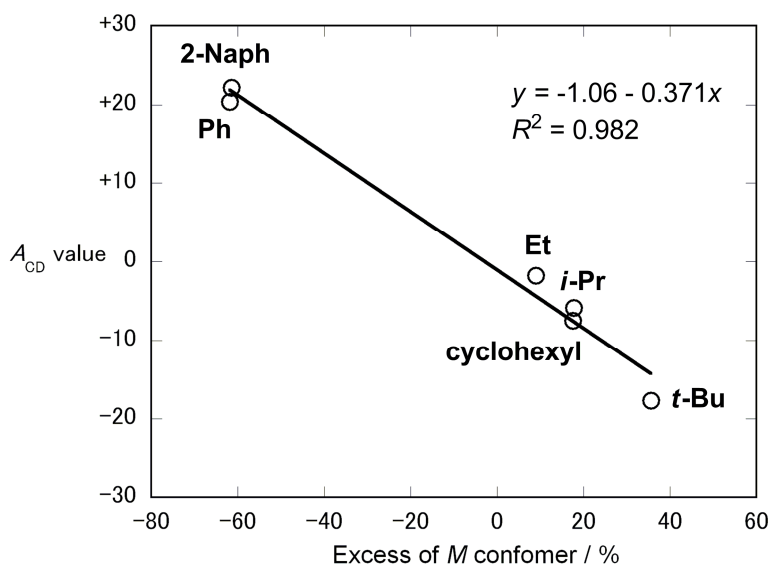

**Figure S44.** The relationship between the *A*<sub>CD</sub> values and excess of *M* conformer. Excess of *M* conformer (%) =  $([M] - [P]) / ([M] + [P]) \times 100$ , where [*M*] and [*P*] are the amounts of *M* and *P* conformers calculated by HF/6-31G\*, respectively.

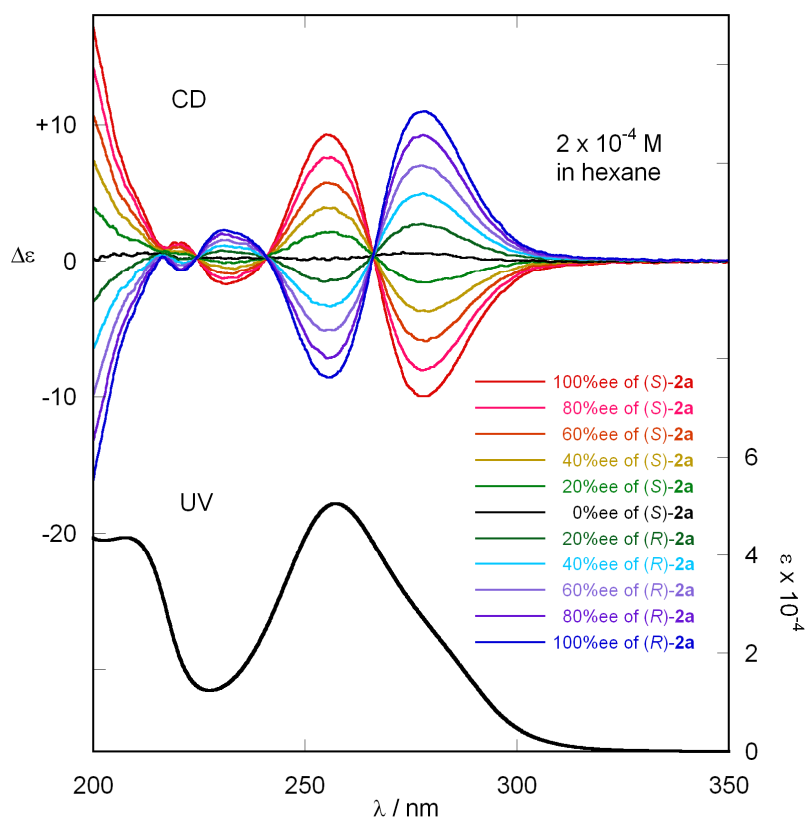

**Figure S45.** CD and UV Spectra of (*S*)-**2a** and (*R*)-**2a** with varying %ee value ( $2 \times 10^{-4}$  M in hexane, 293 K).

### X-ray Structure Determination

Crystals of (*S*)-**2a**, (*S*)-**3a**, and (*S*)-**6a** was mounted on the top of a glass fiber, and the data collection was carried out on a Bruker SMART diffractometer equipped with a CCD area detector at 100–120 K. The data were corrected for Lorentz and polarization effects, and absorption corrections were applied with the *SADABS* program.<sup>3</sup> The structure was solved by direct methods and subsequent difference Fourier syntheses using the program *SHELXTL*.<sup>4</sup> All non-H atoms were refined anisotropically, and H atoms were placed in calculated positions and thereafter refined with  $U_{\text{iso}}(\text{H}) = 1.2U_{\text{eq}}(\text{C})$ .

**Table S16.** Crystal data and structure refinement for (*S*)-**2a**

|                                                     |                                                                 |                       |
|-----------------------------------------------------|-----------------------------------------------------------------|-----------------------|
| Empirical formula                                   | C <sub>34</sub> H <sub>37</sub> N O <sub>2</sub>                |                       |
| Formula weight                                      | 491.65                                                          |                       |
| Temperature                                         | 120 K                                                           |                       |
| Wavelength                                          | 0.71073 Å                                                       |                       |
| Crystal system                                      | Orthorhombic                                                    |                       |
| Space group                                         | <i>P</i> 2(1)2(1)2(1)                                           |                       |
| Unit cell dimensions                                | <i>a</i> = 6.2995(3) Å                                          | $\alpha = 90^\circ$ . |
|                                                     | <i>b</i> = 20.1090(11) Å                                        | $\beta = 90^\circ$ .  |
|                                                     | <i>c</i> = 21.2319(12) Å                                        | $\gamma = 90^\circ$ . |
| Volume                                              | 2689.6(2) Å <sup>3</sup>                                        |                       |
| <i>Z</i>                                            | 4                                                               |                       |
| Density (calculated)                                | 1.214 Mg/m <sup>3</sup>                                         |                       |
| Absorption coefficient                              | 0.074 mm <sup>-1</sup>                                          |                       |
| <i>F</i> (000)                                      | 1056                                                            |                       |
| Crystal size                                        | 0.38 x 0.23 x 0.14 mm <sup>3</sup>                              |                       |
| Theta range for data collection                     | 1.92 to 28.30°.                                                 |                       |
| Index ranges                                        | −8 ≤ <i>h</i> ≤ 8, −26 ≤ <i>k</i> ≤ 26, −28 ≤ <i>l</i> ≤ 24     |                       |
| Reflections collected                               | 20137                                                           |                       |
| Independent reflections                             | 6678 [ <i>R</i> (int) = 0.0275]                                 |                       |
| Completeness to theta = 28.30°                      | 99.9 %                                                          |                       |
| Absorption correction                               | Empirical                                                       |                       |
| Max. and min. transmission                          | 0.9901 and 0.9726                                               |                       |
| Refinement method                                   | Full-matrix least-squares on <i>F</i> <sup>2</sup>              |                       |
| Data / restraints / parameters                      | 6678 / 0 / 482                                                  |                       |
| Goodness-of-fit on <i>F</i> <sup>2</sup>            | 1.035                                                           |                       |
| Final <i>R</i> indices [ <i>I</i> > 2σ( <i>I</i> )] | <i>R</i> <sub>1</sub> = 0.0442, <i>wR</i> <sub>2</sub> = 0.1016 |                       |
| <i>R</i> indices (all data)                         | <i>R</i> <sub>1</sub> = 0.0489, <i>wR</i> <sub>2</sub> = 0.1043 |                       |
| Absolute structure parameter                        | 0.4(11)                                                         |                       |
| Largest diff. peak and hole                         | 0.294 and −0.164 e.Å <sup>-3</sup>                              |                       |

**Table S17.** Crystal data and structure refinement for (*S*)-**3a**

|                                                     |                                                                 |                               |
|-----------------------------------------------------|-----------------------------------------------------------------|-------------------------------|
| Empirical formula                                   | C <sub>36</sub> H <sub>39</sub> N O <sub>2</sub>                |                               |
| Formula weight                                      | 517.68                                                          |                               |
| Temperature                                         | 100 K                                                           |                               |
| Wavelength                                          | 0.71073 Å                                                       |                               |
| Crystal system                                      | Monoclinic                                                      |                               |
| Space group                                         | <i>P</i> 2(1)                                                   |                               |
| Unit cell dimensions                                | <i>a</i> = 5.8922(2) Å                                          | $\alpha = 90^\circ$ .         |
|                                                     | <i>b</i> = 22.0263(9) Å                                         | $\beta = 96.6290(10)^\circ$ . |
|                                                     | <i>c</i> = 11.1024(4) Å                                         | $\gamma = 90^\circ$ .         |
| Volume                                              | 1431.27(9) Å <sup>3</sup>                                       |                               |
| <i>Z</i>                                            | 2                                                               |                               |
| Density (calculated)                                | 1.201 Mg/m <sup>3</sup>                                         |                               |
| Absorption coefficient                              | 0.073 mm <sup>-1</sup>                                          |                               |
| <i>F</i> (000)                                      | 556                                                             |                               |
| Crystal size                                        | 0.24 x 0.17 x 0.13 mm <sup>3</sup>                              |                               |
| Theta range for data collection                     | 1.85 to 30.98°.                                                 |                               |
| Index ranges                                        | −8 ≤ <i>h</i> ≤ 8, −16 ≤ <i>k</i> ≤ 31, −14 ≤ <i>l</i> ≤ 15     |                               |
| Reflections collected                               | 10826                                                           |                               |
| Independent reflections                             | 5823 [ <i>R</i> (int) = 0.0198]                                 |                               |
| Completeness to theta = 30.98°                      | 99.9 %                                                          |                               |
| Absorption correction                               | Empirical                                                       |                               |
| Max. and min. transmission                          | 0.9905 and 0.9826                                               |                               |
| Refinement method                                   | Full-matrix least-squares on <i>F</i> <sup>2</sup>              |                               |
| Data / restraints / parameters                      | 5823 / 1 / 508                                                  |                               |
| Goodness-of-fit on <i>F</i> <sup>2</sup>            | 1.034                                                           |                               |
| Final <i>R</i> indices [ <i>I</i> > 2σ( <i>I</i> )] | <i>R</i> <sub>1</sub> = 0.0386, <i>wR</i> <sub>2</sub> = 0.0934 |                               |
| <i>R</i> indices (all data)                         | <i>R</i> <sub>1</sub> = 0.0457, <i>wR</i> <sub>2</sub> = 0.0981 |                               |
| Absolute structure parameter                        | 1.3(11)                                                         |                               |
| Largest diff. peak and hole                         | 0.292 and −0.201 e.Å <sup>-3</sup>                              |                               |

**Table S18.** Crystal data and structure refinement for (*S*)-**6a**

|                                                     |                                                                 |                               |
|-----------------------------------------------------|-----------------------------------------------------------------|-------------------------------|
| Empirical formula                                   | C <sub>32</sub> H <sub>33</sub> N O <sub>2</sub>                |                               |
| Formula weight                                      | 463.59                                                          |                               |
| Temperature                                         | 100 K                                                           |                               |
| Wavelength                                          | 0.71073 Å                                                       |                               |
| Crystal system                                      | Monoclinic                                                      |                               |
| Space group                                         | <i>P</i> 2(1)                                                   |                               |
| Unit cell dimensions                                | <i>a</i> = 8.5443(7) Å                                          | $\alpha = 90^\circ$ .         |
|                                                     | <i>b</i> = 25.924(2) Å                                          | $\beta = 96.6650(10)^\circ$ . |
|                                                     | <i>c</i> = 11.1528(9) Å                                         | $\gamma = 90^\circ$ .         |
| Volume                                              | 2453.7(3) Å <sup>3</sup>                                        |                               |
| <i>Z</i>                                            | 4                                                               |                               |
| Density (calculated)                                | 1.255 Mg/m <sup>3</sup>                                         |                               |
| Absorption coefficient                              | 0.077 mm <sup>-1</sup>                                          |                               |
| <i>F</i> (000)                                      | 992                                                             |                               |
| Crystal size                                        | 0.24 x 0.13 x 0.06 mm <sup>3</sup>                              |                               |
| Theta range for data collection                     | 1.84 to 26.45°.                                                 |                               |
| Index ranges                                        | -10 ≤ <i>h</i> ≤ 7, -32 ≤ <i>k</i> ≤ 32, -13 ≤ <i>l</i> ≤ 13    |                               |
| Reflections collected                               | 14632                                                           |                               |
| Independent reflections                             | 9414 [ <i>R</i> (int) = 0.0358]                                 |                               |
| Completeness to theta = 26.45°                      | 99.8 %                                                          |                               |
| Absorption correction                               | Empirical                                                       |                               |
| Max. and min. transmission                          | 0.9952 and 0.9819                                               |                               |
| Refinement method                                   | Full-matrix least-squares on <i>F</i> <sup>2</sup>              |                               |
| Data / restraints / parameters                      | 9414 / 1 / 639                                                  |                               |
| Goodness-of-fit on <i>F</i> <sup>2</sup>            | 1.019                                                           |                               |
| Final <i>R</i> indices [ <i>I</i> > 2σ( <i>I</i> )] | <i>R</i> <sub>1</sub> = 0.0519, <i>wR</i> <sub>2</sub> = 0.0993 |                               |
| <i>R</i> indices (all data)                         | <i>R</i> <sub>1</sub> = 0.0773, <i>wR</i> <sub>2</sub> = 0.1118 |                               |
| Absolute structure parameter                        | 1.0(14)                                                         |                               |
| Largest diff. peak and hole                         | 0.220 and -0.211 e.Å <sup>-3</sup>                              |                               |

## References

- (1) Scheuermann, G. M.; Rumi, L.; Steurer, P.; Bannwarth, W.; Mulhaupt, R. *J. Am. Chem. Soc.* **2009**, *131*, 8262.
- (2) Ooi, T.; Uematsu, Y.; Kameda, M.; Maruoka, K. *Tetrahedron* **2006**, *62*, 11425.
- (3) Sheldrick, G. M. *Program for absorption correction of area detector frames*; Bruker AXS, Inc.: Madison, WI, 1996.
- (4) *SHELXTL, version 5.1*; Bruker AXS, Inc.: Madison, WI, 1997.
